# 1           **Extrinsic regulation of interneuron specification and migration**

2   Fabrizia Pipicelli<sup>1,2</sup>, Natalia Baumann<sup>3</sup>, Rossella Di Giaimo<sup>1,4</sup>, Christina Kyrousi<sup>1,5</sup>, Rebecca Bonrath<sup>1</sup>,  
3                                           Denis Jabaudon<sup>3</sup>, & Silvia Cappello<sup>1\*</sup>

## 4 5   Affiliations

6   1 Max Planck Institute of Psychiatry, Munich, Germany

7   2 International Max Planck Research School for Translational Psychiatry, Munich, Germany

8   3 Department of Basic Neurosciences, University of Geneva, Geneva, Switzerland.

9   4 Department of Biology, University of Naples Federico II, Naples, Italy

10   5 Present address: First Department of Psychiatry, Medical School, National and Kapodistrian  
11   University of Athens, Greece and University Mental Health, Neurosciences and Precision Medicine  
12   Research Institute "Costas Stefanis", Athens, Greece.

13   \* Corresponding author. Email: [silvia\\_cappello@psych.mpg.de](mailto:silvia_cappello@psych.mpg.de)

14  
15   **The imbalance between excitatory and inhibitory neurons in the human brain might lead to**  
16   **neurodevelopmental and neuropsychiatric disorders including cortical malformations, epilepsy,**  
17   **and autism spectrum disorders. We propose that the extracellular environment regulates**  
18   **interneuron differentiation and migration during development, ultimately affecting the**  
19   **excitatory/inhibitory balance.**

20   **Using ventral cerebral organoids and dorso-ventral cerebral assembloids with mutations in the**  
21   **extracellular matrix gene *LGALS3BP*, we show that the composition of the extracellular**  
22   **environment regulates the molecular differentiation of neurons, resulting in alterations in**  
23   **migratory dynamics. To investigate how the extracellular environment affects neuronal**  
24   **specification and migration, we characterized the protein content of extracellular vesicles from**  
25   **cerebral organoids carrying a mutation in *LGALS3BP*, previously identified in individuals with**  
26   **cortical malformations and neuropsychiatric disorders. These results revealed differences in**  
27   **protein composition. Interestingly, proteins associated with cell-fate decision, neuronal migration**  
28   **and extracellular matrix composition were altered in mutant extracellular vesicles. Moreover, we**  
29   **show that treatment with extracellular vesicles changes the transcriptomic profile in neural**  
30   **progenitor cells. Our results indicate that neuronal molecular differentiation is regulated by**  
31   **factors released into the extracellular environment.**

32

33

## 34 **Introduction**

35 Neurogenesis and neuronal migration are essential processes for mammalian brain development,  
36 especially for the correct assembly of neuronal circuits. Cortical circuitry function relies on adequate  
37 excitatory/inhibitory (E/I) balance, coordinated by glutamatergic and GABAergic neuronal activities,  
38 such that regulation of migration of these respective cell types during development is critical(Guo and  
39 Anton, 2014; Steinecke et al., 2014).

40 The mammalian neocortex is mainly populated by glutamatergic excitatory neurons, while GABAergic  
41 inhibitory neurons (here “interneurons”, INs) are present in smaller proportions(Peyre et al., 2015). In  
42 rodents, approximately 15-20% of neocortical neurons are INs(Tatti et al., 2017), while primates,  
43 including humans, have higher proportions(Džaja et al., 2014; Krienen et al., 2020).

44 In humans, excitatory neurons are generated from apical and basal radial glia cells (aRGs and bRGs,  
45 respectively) and intermediate progenitors (IPs) located in the germinal zones: the ventricular (VZ),  
46 subventricular (SVZ), and outer subventricular zone (OSVZ). Using the basal process of aRGs and  
47 bRGs as a scaffold, they migrate radially into the cortical layers. This process relies on the integrity of  
48 aRGs, and defects in radial migration can lead to disorganization of cortical layers or ectopic neurons,  
49 which are hallmarks of cortical malformations(Fernández et al., 2016; Fietz and Huttner, 2010; Klaus  
50 et al.).

51 While excitatory neurons migrate and remain in the dorsal forebrain, most cortical INs migrate over  
52 long distances from their birthplace to their final positions in the neocortex. Specifically, INs are born  
53 in the ganglionic eminences (GEs) in the ventral forebrain from the proliferative zone of the medial  
54 ganglionic eminence (MGE) and the caudal ganglionic eminence (CGE)(Bajaj et al., 2021; Peyre et al.,  
55 2015). As they became post-mitotic, INs migrate tangentially into the neocortex. INs are highly  
56 polarized and, during their migration, they extend branches from the leading process. The stabilization  
57 of one of the branches leads to cytoskeleton remodeling that results in nucleus displacement in a process  
58 called nucleokinesis. This cyclic movement is characteristic of interneuron migrations and, in particular,  
59 of their saltatory migratory behavior(Bellion et al., 2005; Peyre et al., 2015; Silva et al., 2018).

60 The extracellular matrix (ECM), a complex and dynamic cellular microenvironment, plays a crucial  
61 role in progenitor proliferation, differentiation, morphogenesis, and neuronal migration during brain  
62 development (Long and Huttner, 2019). Specifically, IN migration is guided by extracellular attractive  
63 and repulsive cues, such as extrinsic signals, including molecules and proteins secreted in ECM or by  
64 cell-cell contact. Eph and ephrins, as well as Robo and Slit and netrins, are attractive and repulsive cues  
65 that guide cell migration(Amin and Borrell, 2020; Lim et al., 2018; Marín and Rubenstein, 2001; Peyre  
66 et al., 2015).

67 In this study, we analyze the role of the extracellular environment in IN specification and migration,  
68 focusing on the ECM component LGALS3BP. Within the ECM, LGALS3BP interacts with integrins,  
69 fibronectins, galectins, laminins, and tetraspanins(Lee et al., 2010; Stampolidis et al., 2015).

70 We have previously shown that *LGALS3BP* is enriched in human neuronal progenitor cells (NPCs), and  
71 its product is secreted via extracellular vesicles (EVs)(Kyrousi et al., 2021). A *de novo* variation in the  
72 exon 5 of *LGALS3BP* has been diagnosed in a patient presenting cortical malformations, developmental  
73 delay, autism, dysarthria, ataxia, and focal seizures, suggesting its crucial role during brain  
74 development. Moreover, we recently showed that LGALS3BP is critical for human corticogenesis,  
75 shaping the extracellular environment and regulating NPC delamination and neuronal migration  
76 through its extrinsic function(Kyrousi et al., 2021).

77 Here, using human cerebral organoids and assembloids, we propose that interneuron differentiation is  
78 influenced by secreted factors released in the extracellular environment. Our findings suggest that  
79 changes in the extracellular environment, given by the *LGALS3BP* variant, are involved in maintaining  
80 excitatory/inhibitory (E/I) neurons balance during brain development.

## 81 **Results**

### 82 ***LGALS3BP* E370K-mutant ventral organoids show alteration in cell identity**

83 To investigate if the E/I balance is influenced by secreted factors, we chose LGALS3BP as a model to  
84 study this response, mainly because it is secreted and functions during neurodevelopment(Kyrousi et  
85 al., 2021).

86 To this end, we generated ventral forebrain organoids (vCOs) (Fig EV1A and B)(Bagley Joshua A ,  
87 Reumann Daniel , Bian Shan, 2017). The vCOs serve as a model to investigate cell fate and  
88 differentiation of ventral progenitors into INs. The ventral proliferative zones of MGE and CGE  
89 generate different subpopulations of INs(Peyre et al., 2015), while LGE mostly gives rise to medium-  
90 spiny neurons (MSNs)(Miura et al., 2020) (Fig EV1A). We used an iPSC line carrying the *LGALS3BP*  
91 variant in heterozygosity (E370K) previously described(Kyrousi et al., 2021) (Fig EV1C). We, then,  
92 generated vCOs from isogenic control and E370K iPSC line. Mutant vCOs are characterized by a  
93 significant decreased LGALS3BP expression compared to the control (Fig 1A and B). We then  
94 analyzed the expression of typical markers of MGE (NKX2-1), CGE (PAX6), and LGE  
95 (MEIS2)(Bagley et al., 2017; Miura et al., 2020; Yu et al., 2021). We observed a significant decrease  
96 of NKX2-1+ cells and a significant increase of PAX6+ and MEIS2+ cells in E370K vCOs (Fig 1C and  
97 D). This suggests that E370K vCOs generate more CGE and LGE regions; however, PAX6 is also a  
98 marker for dorsal cortical progenitors in VZ and SVZ. To understand the regional identity of the PAX6+  
99 cells found in the E370K vCOs, we performed immunohistochemistry for EOMES, dorsal markers of  
100 cortical intermediate progenitors (IP), TBR1, marker of deep layer cortical neurons and SATB2, marker  
101 of upper layer cortical neurons (Fig 1E). Surprisingly, E370K vCOs express EOMES, TBR1, and

102 SATB2. EOMES labeled cells in 50% of observed ventricles, TBR1 in about 60%, and SATB2 in about  
103 90%, indicating that the E370K vCOs unexpectedly express dorsal cortical markers (Fig 1F). The  
104 presence of cortical IP and neurons was combined with a significant decrease in CALB2+  
105 interneurons(Kanton et al., 2019; Yu et al., 2021) in E370K vCOs (Fig 1G and H), showing an  
106 imbalance in excitatory/inhibitory neuron proportions.

107 Moreover, to avoid masking the phenotype due to the functional allele in the heterozygous E370K  
108 variant, we also genetically edited an iPSCs line carrying the Y366Lfs variation in *LGALS3BP* in  
109 homozygosity(Kyrousi et al., 2021) (Fig EV1C). We then generated Y366Lfs-vCOs. As was the case  
110 in E370K vCOs, Y366Lfs-vCOs showed reduced expression of *LGALS3BP* (Fig EV1D) and expressed  
111 EOMES, TBR1, and SATB2, suggesting that functional *LGALS3BP* is essential for the correct  
112 specification of INs (Fig EV1E and F). These results show that *LGALS3BP* plays a role in dorso-ventral  
113 patterning, regulating cell differentiation in the ventral forebrain.

#### 114 ***LGALS3BP* variation causes alteration in cell fate and developmental trajectory**

115 To dissect the transcriptional signatures of altered cells in the E370K-vCOs, we performed single-cell  
116 RNA-sequencing (scRNA-seq) analysis in 60-day old CTRL-vCOs and E370K-vCOs. The 5369  
117 identified cells clustered into eight main groups (Fig 2A and B), including progenitors expressing  
118 *TOP2A* and IP expressing *NKX2-1*, *ASCL1* and *PAX6*, and neurons expressing *MAP2* and *DLX5* (Fig  
119 2C). We also identified cortical genes, such as *TBR1*, *NEUROG1*, *GLI3* and *SLC17A6* being expressed  
120 in E370K vCOs (Fig 2C and Fig EV2A), confirming their dorsal identity also at the molecular level.

121 To investigate if the *LGALS3BP* variation could cause developmental trajectory alteration, ventral  
122 telencephalic cells were aligned on a developmental pseudo-differentiation showing the trajectory from  
123 progenitors to neurons (Fig EV1B and C). Using Monocle3(Trapnell et al., 2014), ([https://cole-trapnell-  
124 lab.github.io/monocle3/](https://cole-trapnell-lab.github.io/monocle3/)), we identified pseudotime trajectories in both CTRL-vCOs and E370K-vCOs  
125 (Fig 2D and E and Fig EV2D and E). As expected from the decrease of *NKX2-1*+ MGE IP (Fig 1C and  
126 D and Fig EV2F-H) in E370K-vCOs, the IP-MGE IP trajectory is missing in mutant organoids.

127 Next, we performed differential expression (DE) analysis in progenitors, IP and MGE-IP, and neurons.  
128 Interestingly, all the three populations of E370K-vCOs downregulated transcription factors (TFs) - such  
129 as *NKX2-1*, *NKX6-2*, *SIX3*, *OCIAD2* - and the secreted molecule *SHH*, associated with a ventral  
130 patterning. On the other hand, E370K-vCOs upregulate dorsal TFs, like, *PAX6*, *PTN*, *POU3F2*, *GLI3*,  
131 and *NEUROG2*, and the secreted molecule *WLS* confirms the dorsal identity of E370K ventral cells. In  
132 particular, we found dysregulation of the WNT, NOTCH, and HEDGEHOG pathways, known to  
133 regulate cell differentiation and dorso-ventral patterning(Hayward et al., 2008). We also identified  
134 molecules associated with axon guidance: *EFNA5*, *EPHB2*, *SEMA5B*, and *SLIT2*. Interestingly, also  
135 *FAT4*, *DLL1*, and *RND2*, genes previously associated with periventricular heterotopia (PH)(Klaus et  
136 al.), were dysregulated in E370K-vCOs (Fig 2 H-J), suggesting that the cell fate switch can affect the



137 migration of neurons. Mutant neurons show downregulation of interneuron markers, such as *DLX1*,  
138 *DLX2*, *DLX5*, while they upregulate cortical markers like *NEUROG1*, *NEUROG2*, *NEUROD4*, (Fig  
139 2H) confirming the excitatory/inhibitory unbalance found in E370K vCOs.

140 The DE analysis revealed that E370K-vCOs dysregulate genes are involved in pattern specification,  
141 regionalization, differentiation, and neurogenesis as indicated from the enriched GO terms (Fig. EV 2I-  
142 K), suggesting a specific contribution of *LGALS3BP* in human ventral forebrain development. The  
143 alteration in expression of secreted and transmembrane molecules, such as *SHH*, *WLS*, *EPHB2*, and  
144 *SLIT2*, in E370K vCOs, show that cell fate might be regulated in an extrinsic way.

#### 145 **Cell fate changes result in migratory defects**

146 Excitatory and inhibitory neurons migrate in different ways (Buchsbbaum and Cappello, 2019; Silva et  
147 al., 2018), and, an altered cell fate could lead to migratory defects.

148 To investigate how E370K vCOs with dorsal identity migrate, we generated human dorso-ventral  
149 cerebral assembloids (dvCAs), a suitable human model system to study interneuron migration by  
150 resembling the ventral-dorsal forebrain axis in vitro (Bagley Joshua A , Reumann Daniel , Bian Shan,  
151 2017; Birey et al., 2017; Xiang et al., 2017) (Fig EV1A). dvCAs express typical ventral forebrain  
152 markers such as *NKX2-1* in the ventral region (vCAs) and dorsal forebrain markers such as *TBR1* in  
153 the dorsal region (dCAs) (Fig EV1B).

154 We then generated dvCAs from isogenic control and genetically edited iPSCs, *LGALS3BP*-E370K  
155 (E370K) (Fig 3A). We generated control dvCAs (vCTRL-dCTRL), and dvCAs with mutant ventral  
156 side (vE370K-dCTRL) to focus on the migration of cells with the *LGALS3BP* variation (Fig 3A).

157 To monitor migrating neurons, we first analyzed neurons migrated into the dorsal region, by quantifying  
158 the number of cells migrating from the ventral (GFP+, in green) to the dorsal (RFP+, in magenta) region  
159 in dvCAs (Fig 3B). Despite an absence of significant differences in the total number of migrated cells  
160 (Fig EV3B), we observed significant changes in their distribution within the dorsal region of CAs. We  
161 analyzed the distribution of GFP+ cells migrated from the ventral to the dorsal region of CAs by  
162 subdividing the dorsal region (dCAs) into three equally distributed regions (bins in Fig 3B). In control  
163 dvCAs, GFP+ migrating cells mainly were distributed among bin2 (~45%) and bin3 (~55%) of the  
164 CTRL-dCAs. In the vE370K-dCTRL CAs, most of the cells (70%) were found in bin2 and only 10%  
165 in bin3 of CTRL-dCAs, showing a different distribution of mutant cells when they migrate into the  
166 dorsal region, probably because of their altered molecular identity. We then quantified the percentage  
167 of ventral E370K GFP+ cells that expressed *TBR1* or *SATB2* in CTRL-dCAs (Fig 3C) to assess if  
168 ventral E370K neurons expressing cortical markers migrate to dCAs. Interestingly, 30% of total E370K  
169 GFP+ migrated cells express *TBR1* while 10% express *SATB2*. On the contrary, CTRL GFP+ ventral  
170 cells were absent in CTRL-dCAs, as expected (Fig 3D). We additionally quantified *TBR1*+ cells in  
171 CTRL-vCAs and E370K-vCAs and the *TBR1*+GFP+ cells in CTRL-dCAs after clearing (Masselink et

172 al., 2019) (Fig EV3B). We confirmed the presence of both TBR1+ cells in E370K-vCAs (Fig EV3C)  
173 and GFP+TBR1+ cells migrated from E370K-vCAs in the CTRL-dCAs (Fig EV5D).

174 We showed that scRNA-seq data from mutant neurons revealed alteration of secreted molecules  
175 associated with axon guidance (Fig 2H), suggesting changes in migratory dynamics. To dissect the  
176 migratory dynamics and behavior of E370K neurons, we monitored the trajectories of GFP+ cells in  
177 dCAs. We performed time-lapse imaging of 60-day old dv-CAs slices and tracked the GFP+ ventral  
178 cells during their migration within dCAs (Fig 3E). We measured velocity (speed of migration), resting  
179 timepoints (time cells spend without moving), and tortuosity (the ability to move in a straight trajectory)  
180 as previously described in Klaus et al., 2019(Klaus et al.) (Fig 3F). For all three parameters, we observed  
181 a significant difference compared with the control. We found that speed of migration decreased, and  
182 resting timepoints and tortuosity increased, as previously shown in the case of mutations of the PH  
183 genes *DCHS1* and *FAT4*(Klaus et al.). Interestingly, not only neuronal dynamics but also similar genes  
184 (*ROBO3*, *GNG5*, *DCC*) were altered in E370K ventral neurons and *DCHS1* and *FAT4* altered  
185 neurons(Klaus et al.), suggesting common signatures for neurons associated with PH (Fig EV3D and  
186 E). In support of their fate switch, the average speed of the E370K ventrally-generated neurons is similar  
187 to the one of previously observed dorsally-generated control neurons analyzed in Klaus et al.,  
188 2019(Klaus et al.) (Fig EV3F). Altogether, these results show that cell fate changes, observed in the  
189 E370K cells, lead to migratory dynamics alteration, especially in directionality, sliding movement, and  
190 speed.

### 191 **Extrinsic effect of LGALS3BP in ventral progenitor fate and neuronal specification**

192 In previous work, we showed that the addition of control culture media to E370K-COs rescues the  
193 phenotype observed, restoring the number of proliferating cells, the thickness of the apical belt, and the  
194 localization of neurons(Kyrousi et al., 2021). This finding highlights the extracellular function of  
195 LGALS3BP, supporting the important role of the extracellular environment in brain development,  
196 suggesting that secreted molecules and proteins regulate cell proliferation, delamination, and  
197 distribution.

198 To assess if the dorsal identity acquired by the mutant cells can be reverted by providing a more  
199 physiological extracellular environment, we generated ventral mosaic organoids (vMOs), containing  
200 both isogenic control iPSCs and GFP+ E370K IPCs (Fig 4A).

201 We performed scRNA-seq analysis on vMOs, and the 4898 identified cells were clustered into five  
202 main clusters (Fig 3B and C), including progenitors expressing *TOP2A*, IP expressing *NKX2-1* *ASCL1*,  
203 *PAX6*, neurons expressing *DLX5* and *MAP2*(Bajaj et al., 2021; Yu et al., 2021) (Fig 4D). Cortical genes  
204 such as *TBR1*, *NEUROG1*, *GLI3* and *SLC17A6*- are also expressed in vMOs, but at lower levels  
205 compared to E370K vCOs (Fig 4D and E and Fig 2C and Fig EV2A). As for the E370K vCOs, E370K  
206 progenitors, IP and MGE-IP obtained from vMOs express higher level of dorsal genes such as *PAX6*

207 and *GLI3* compared to the control. Interestingly, gene expression of cortical markers such as *TBRI*,  
208 *NEUROG1* and *SLC17A6* is decreased in E370K neurons generated from vMOs, showing a partial  
209 rescue of the neuronal identity affected in the mutant vCOs (Fig 4D and E, Fig 2C and Fig EV2A).

210 The identified ventral telencephalic cells were aligned on a developmental pseudotime showing the  
211 trajectory from progenitors to neurons, as seen in vCOs (Fig EV4B and C). Using Monocle3(Trapnell  
212 et al., 2014), (<https://cole-trapnell-lab.github.io/monocle3/>), we identified pseudo-time trajectories in  
213 both CTRL and E370K cells obtained from the vMOs (Fig 4F and G). The pseudotime trajectories were  
214 populated by both CTRL and E370K cells and resemble the ones found in CTRL-vCOs, suggesting a  
215 partial rescue of the E370K cells exposure (due to the close proximity) to CTRL cells in the vMOs.

216 Specifically, the cell proportions of progenitors, IP, and MGE IP are increased compared to the E370K-  
217 vCOs (Fig EV4D-F and Fig EV2F-H). In E370K-vMOs we observed an increase of 30% of cells in  
218 progenitors, 25% in IP, and 50% in MGE IP compared to the E370K-vCOs, indicating a change also in  
219 cell proportions when cells differentiate in a more physiological environment.

220 These results suggest an extrinsic regulation of neuronal cell fate and differentiation. The ventral  
221 molecular identity rescue observed in the E370K cells was guided by the presence of CTRL neighboring  
222 cells. On the contrary, both progenitors and IP retained their dorsal identity, downregulating *NKX2-1*  
223 and *SHH*, suggesting an extrinsic control over neuronal specification. This is in line with the progressive  
224 specification hypothesis, which states that interneurons are restricted to a particular subtype at birth, but  
225 their definitive identities are established later in development, and they are shaped by the extracellular  
226 (cortical) environment(Kepecs and Fishell, 2014; Wamsley and Fishell, 2017).

### 227 **LGALS3BP can revert the molecular identity of mutant ventral progenitors and interneurons**

228 To investigate the molecular identity of E370K vCOs and vMOs, we built a dorso-ventral model that  
229 predicts the dorsal or ventral molecular identity of cells based on their transcriptomic features, defining  
230 the dorso-ventral score (DV) (Fig EV5A). We performed cluster analysis of scRNA-seq transcriptome  
231 data from CTRL-dCOs and CTRL-vCOs, E370K-vCOs, and CTRL/E370K-vMOs (Fig 5A) and  
232 identified three main clusters: progenitors expressing *TOP2A*, IP expressing *TTYH1*, and neurons  
233 expressing *MAP2* (Fig 5B-D and Fig EV5B).

234 As expected, the dorso-ventral prediction model revealed the highest DV score in CTRL-dCOs and the  
235 lowest in control CTRL-vCOs (Fig 5E). All the other conditions showed blended dorso-ventral identity  
236 and were distributed according to extrinsic short-distance exposure. E370K-vCOs cells mapped midway  
237 through the dorso-ventral trajectory while cells from the vMOs were mapping similarly. As expected,  
238 CTRL cells from vMOs were closer to CTRL cells from vCOs, while E370K cells from vMOs were  
239 closer to E370K-vCOs. These data strongly indicate that E370K cells acquire a dorsal molecular  
240 identity, and this can be reverted by exposure to CTRL cells. Finally, CTRL cells from vMOs show  
241 mostly a ventral score with some outlier cells with a higher DV score, suggesting that also CTRL cells

242 have been affected by the extracellular environment generated by the neighboring E370K cells (Fig 5E  
243 and Fig EV5C and D).

244 Gene expression is affected in both CTRL and E370K cells from vMOs. *NKX2-1* and *DLX5*, which are  
245 almost no detectable or have low expression levels in E370K-vCOs, are expressed along the pseudo-  
246 differentiation axis in E370K cells from vMOs (Fig 5F). *GLI3* and *POU3F2*, which are mostly  
247 expressed in CTRL-dCOs, are highly expressed in E370K-vCOs, but lower in E370K cells vMOs,  
248 without showing great changes in CTRL cells from vMOs (Fig 5G).

249 To map CO single-cell transcriptome data to the developing mouse brain, we then used VoxHunt(Fleck  
250 et al., 2021) (<https://quadbiolab.github.io/VoxHunt/>) obtained from situ hybridization data (Allen  
251 Developing Mouse Brain Atlas, Thompson et al., 2014). As suspected, transcriptome data from CTRL  
252 dCOs and vCOs, map, respectively, to the mouse cortex (pallium) and ventral forebrain (subpallium).  
253 Data from E370K-vCOs, map to the ventral forebrain but also to the mouse cortex, confirming their  
254 dorsal molecular identity. CTRL and E370K cells from vMOs, mostly map to the ventral forebrain;  
255 however, E370K cells still show a correlation with the mouse pallium (Fig EV5E). Altogether, these  
256 findings show that the molecular identity of progenitors, intermediate progenitors, and neurons is  
257 influenced by extrinsic factors.

### 258 **Extrinsic function of LGALS3BP in progenitor specification and neuronal migration**

259 During brain development, neurogenesis and cell migration are influenced by extrinsic factors released  
260 in the ECM, also via EVs(Peruzzotti-Jametti et al., 2021; Sharma et al., 2019; Taverna and Huttner,  
261 2010). Our previous work indicated that LGALS3BP is secreted in EVs in human cerebral organoids  
262 and has a crucial role in modulating the extracellular space(Kyrousi et al., 2021). To investigate the  
263 extracellular mechanisms underlying cell fate switch and neuronal migration found in E370K dvCOs,  
264 we performed proteomic analysis of EVs collected from CTRL and E370K vCOs (Fig 6A and Fig  
265 EV6A).

266 We characterized proteins detected in EVs from CTRL and E370K vCOs (vEVs) (Fig EV6B).  
267 Interestingly, E370K-vEVs show a different protein composition with a lower number of different  
268 proteins (Fig EV6B and Fig 6B). Since we found LGALS3BP being secreted from ventral COs, we  
269 hypothesize that EV-mediated secretion could regulate cell fate decisions in vCOs. (Fig EV6C).

270 We then performed DE analysis in vEVs. Interestingly we found the secreted molecule SHH (involved  
271 in dorso-ventral patterning inducing ventralization(Rallu et al., 2002)) being downregulated in E370K-  
272 vEVs suggesting that the low level of SHH carried by EVs in the extracellular space might influence  
273 the differentiation of neighboring cells, resulting in a dorsal cell fate. Signaling protein DVL2, known  
274 to downregulate the Wnt pathway(Jiang et al., 2015), is downregulated in mutant EVs. The decrease of  
275 DVL2 in mutant EVs could lead to an activation of the WNT pathway in neighboring cells, resulting in  
276 transcription of dorsal genes(Altmann and Brivanlou, 2001; Chi et al., 2017). EVs secreted by E370K-

277 vCOs also showed dysregulated proteins involved in cell migration and motility (Fig 6E) – PLXNA1,  
278 SEMA3G, KIF1A, EPHA2, EPHB2, SLIT1- and proteins of the ECM – HAPLN1, LUM, VCAN –  
279 known to modulate cell proliferation and differentiation(Amin and Borrell, 2020; Long et al., 2018;  
280 Maeda, 2015). We showed that E370K vCOs have altered the secretion of proteins involved in cellular  
281 migration, differentiation, dorso-ventral patterning which could explain the extrinsic effect on these  
282 processes. Therefore, we hypothesize that EVs might regulate progenitors' cell fate and motility,  
283 resulting in the dorsal identity observed in ventral E370K neurons.

284 To this end, we treated NPCs in 2D acutely (12 hours) with EVs isolated from control and E370K vCOs  
285 (Fig 6D) and identified upregulated genes in the recipient cells. Interestingly, the RNA-seq analysis  
286 performed on NPCs revealed upregulation of WNT and NOTCH pathways (gene networks in Fig 6E  
287 and F) after treatment with E370K-vEVs, showing a similar profile with the E370K neural progenitors  
288 isolated from vCOs and analyzed by single-cell RNA-Seq (Fig 2F). These results suggest that mutant  
289 EVs can change the transcriptomic profile of NPC (Fig EV6D) and activate pathways involved in cell  
290 dorso-ventral patterning and cell-cell communication resulting in alteration in their fate(Kumar et al.,  
291 2019)(Hayward et al., 2008; Lai, 2004; De Strooper and Annaert, 2001). Moreover, upon treatment  
292 with E370K-vEVs, NPCs show upregulation of genes involved in axon guidance (gene network in Fig  
293 6G), as it was found in E370K neurons isolated from vCOs and analyzed by single-cell RNA-Seq (Fig  
294 2H). Altogether, these results propose an extrinsic regulation of neuronal differentiation and migration  
295 mediated via EVs.

296 We showed that vCOs with a variation in the ECM protein LGALS3BP reveal dorsal identity and  
297 migratory defect that can lead to NDDs. It has been shown that EVs can also transport ECM remodeling  
298 cargoes, like matrix metalloproteinases, that regulate cell growth, differentiation, and cell  
299 migration(Nawaz and Fatima, 2017). Altered deposition of collagens mediated via EVs can change the  
300 ECM composition and might lead to NDDs(Amin and Borrell, 2020). To better correlate the  
301 dysregulated network of proteins altered in E370K-EVs with NDDs, we identified proteins whose genes  
302 are associated with cortical malformations (CMs), autism spectrum disorder (ASD), and epilepsy (EP).  
303 We identified multiple proteins altered in E370K-EVs compared to control EVs that are mostly  
304 associated with microtubule organization, morphogenesis and synaptic activity highlighting the key role  
305 of EVs-mediated signaling in NDDs (Fig EV6E-G).

## 306 **Discussion**

307 Defects in interneurons specification, migration, and/or recruitment might cause an  
308 excitatory/inhibitory imbalance in neuronal circuits, characteristic of neurological disorders, such as  
309 epilepsy and ASD. For example, we have recently found that individuals affected with EPM1  
310 (Progressive Myoclonus Epilepsy type1) show loss GABA synaptic terminals(Buzzi et al., 2012) and  
311 recruitment of INs is altered in EPM1-hCAs(Di Matteo et al., 2020). Moreover, some ASD patients



312 have reduced GABAergic neurons in the cortex(Ariza et al., 2018; Puts et al., 2016), and organoids  
313 derived from patients with ASD show dysregulation in genes involved in GABAergic interneuron  
314 differentiation and migration(Wang et al.)(Mariani et al., 2015). Other studies performed in cerebral  
315 organoids with mutation of ASD-associated genes revealed alteration in of both GABAergic and  
316 excitatory neuron developmental trajectories.(Paulsen et al., 2022; Villa et al., 2022)

317 In this work, we showed that vCOs with a mutation in the *LGALS3BP* gene exhibit alterations in the  
318 dorso-ventral patterning resulting in dorsal identity. Previous studies in mice showed that the  
319 dorsoventral patterning during brain development is regulated by *Pax6*, *Gli3*, *Shh*(Fuccillo et al., 2006;  
320 Theil et al., 1999; Tole et al., 2000). *Gli3* and *Pax6* mutant mice show ventral identity acquired by  
321 dorsal pallial tissue expressing ectopic *Dlx2*(Theil et al., 1999; Tole et al., 2000). Mice carrying a  
322 deletion in the *Gli3* gene show ectopic ventral telencephalic identity in the dorsal forebrain, probably  
323 given by an alteration in the *Wnt* pathway(Tole et al., 2000). We previously described the extracellular  
324 function of LGALS3BP in regulating proliferation, NPCs delamination, neuronal distribution, and  
325 migration(Kyrousi et al., 2021). In this study, we propose an extrinsic regulation mediated by  
326 LGALS3BP in ventral progenitor specification. In the ECM, LGALS3BP binds Galectin-3 (LGALS3),  
327 forming a complex that interacts with membrane tetraspanins CD9 and CD82, activating the Wnt/b-  
328 catenin signaling(Lee et al., 2010; Pikkarainen et al., 2017). This pathway triggers the gene expression  
329 of Wnt target genes in the dorsal forebrain(Chi et al., 2017). One possible scenario is that the E370K  
330 variation activates the Wnt/b-catenin signaling in ventral COs. The activation of the signaling might  
331 lead to the expression of *PAX6* and repression of *NKX2-1*, resulting in the expression of other cortical  
332 dorsal genes (*EOMES*, *TBR1*, and *SATB2*) that define the dorsal identity of E370K vCOs. Moreover,  
333 Wnts can act as paracrine molecules, affecting neighboring cells. We showed that the extracellular  
334 environment influences molecular identity and neurons specification in vMOs. In vMOs, control and  
335 mutant progenitors share similar transcriptomic features; however, after the IPs transition, they reveal  
336 their intrinsic program identity (ventral for control and more dorsal for E370K). Final IN identity is  
337 refined at later stages in interaction with the local extracellular environment. Indeed, we showed that  
338 the proximity of control cells has partially reverted the dorsal identity of E370K cells.

339 Because of neuronal cell fate changes, the migration of neurons is affected, indeed the dorsal identity  
340 acquired by E370K neurons could result in a different response to extrinsic attractive/repulsive stimuli.  
341 We described the migratory behavior of E370K cells, finding a significant decrease in velocity that  
342 become more similar to radially migrating excitatory neurons as shown previously(Klaus et al.). These  
343 cells reflect a more tortuous migratory behavior as it was previously described in migrating neurons  
344 derived from an individual with PH (with a mutation in *DCHS1* and *FAT4*)(Klaus et al.). Interestingly,  
345 ventrally-derived neurons in E370K show similar molecular signatures with the altered neurons found  
346 in *DCHS1* and *FAT4* patients' organoids, suggesting shared dysregulated pathways in ectopic neurons  
347 accumulating below the white matter in patients with PH. Future studies with cells derived from PH



348 patients with different mutations will be essential to understand if there are common signatures for all  
349 PH neurons, providing additional tools to target a specific subpopulation of affected neurons.

350 We showed that EVs carry secreted molecules that drive dorso-ventral patterning and neuronal  
351 migration. Treatment with E370K-vEVs can activate WNT and NOTCH pathways as well as genes  
352 associated with neuronal migration and motility in NPCs, confirming their role in cell fate and  
353 migration.

354

355

### 356 **Conclusion**

357 In conclusion, we propose that the EVs can modulate neuronal progenitors fate regulating the dorso-  
358 ventral patterning and instruct interneuron migration during brain development. Indeed, a mutation in  
359 the ECM component LGALS3BP alters cell fate specification and migration via regulation mediated  
360 by factors secreted by EVs. We suggest that the extracellular environment has a key role in the  
361 maintenance of excitatory/inhibitory balance during brain development. Thus, the alteration of cell  
362 identity and migration caused by the LGALS3BP E370K variation could lead to the disruption of the  
363 E/I balance, which might lead to neurodevelopmental and neuropsychiatric disorders.

364

365

366

367

368

369

370

371

372

373

374

375

376

377 **Figure legends**

378 **Fig 1 *LGALS3BP* E370K-mutant ventral organoids show alteration in cell identity**

379 A. Representative immunostaining of vCOs for SOX2 (green) and *LGALS3BP* (magenta). Scale bar:  
380 50  $\mu\text{m}$ .

381 B. Quantification of the percentage of pixel of the *LGALS3BP* staining in GE unit ( $\mu\text{m}^2$ ). Data are  
382 shown mean  $\pm$  SEM. Statistical significance was based on two-tailed Mann-Whitney U test  
383 \*\*\*\* $p < 0.0001$ .

384 C. Representative immunostaining of vCOs for MGE marker (NKX2-1, magenta), for CGE marker  
385 (PAX6, green) and LGE markers (MEIS2, magenta). Scale bar: 50  $\mu\text{m}$ .

386 D. Quantification of the number NKX2-1, PAX6 and MEIS2 +cells per GE unit ( $\mu\text{m}^2$ ). Data are shown  
387 mean  $\pm$  SEM. Statistical significance was based on two-tailed Mann-Whitney U test \*\*\* $p < 0.001$ .

388 E. Representative immunostaining of vCOs for cortical markers of IPs (EOMES) of deep layer neurons  
389 (TBR1) and upper layer neurons (SATB2). Scale bar: 50  $\mu\text{m}$ .

390 F. Quantification of percentage of ventricles with EOMES+cells (>10 cells) (top), TBR1+cells (>10  
391 cells) (middle) and SATB2+cells (>10cells) (bottom) in the ventral side of vCOs. Statistical  
392 significance was based on exact binomial test \*\*\*\* $p < 0.0001$ . n of ventricles: for EOMES, CTRL=96,  
393 E30K=53; for TBR1, CTRL=100, E30K =107; for SATB2, CTRL=48, E30K =76; from 3 different  
394 batches.

395 G. Representative immunostaining of vCOs for CALB2. Scale bar: 50  $\mu\text{m}$ .

396 H. Quantification of the percentage of pixel of the CALB2 staining in GE unit ( $\mu\text{m}^2$ ). Data are shown  
397 mean  $\pm$  SEM. Statistical significance was based on two-tailed Mann-Whitney U test \*\* $p < 0.01$ .

398 Every dot in the plots refers to analyzed ventricles per vCO from at least 3 different vCOs generated in  
399 at least 2 independent batches.

400

401

402 **Fig 2 *LGALS3BP* variation causes alteration in cell fate and developmental trajectory**

403 A-B UMAP visualization of scRNA-seq clusters of control and E370K vCOs (n= 4898 cells from a  
404 pool of 5 organoids each condition).

405 C. Feature plot depicting the expression of progenitor markers (TOP2A), IPs markers (TTYH1, NKX2-  
406 1, ASCL1, PAX6) and neurons (DLX5, MAP2, TBR1, NEUROG1, GLI3, SLC17A6) in vCOs.

407 D-E. UMAP visualization of pseudo-time trajectories in control vCOs and in E370K from progenitors  
408 to INs.

409 F-H Volcano plot showing the fold change (CTRL vs E370K) of gene expression (top) and GO terms  
410 of dysregulated pathways (bottom) in progenitors, IP and MGE IP, and in neurons in vCOs.

411

412

413 **Fig 3 Cell fate changes result in migratory defects**

414 A. Schematic of experimental set-up showing different combinations of dvCAs.

415 B. Binning analysis in cleared dvCAs. Scale bar: 200  $\mu\text{m}$  (left) and quantification of distribution of  
416 GFP+ventral cells migrated from ventral to dorsal in dvCAs (right). Box plots show median and  
417 interquartile range. Statistical significance was based on the Mann-Whitney U test  $*p<0.05$ . Every dot  
418 in the plots refers to analyzed vCOs generated in at least 2 independent batches.

419 C. Representative immunostaining of dorsal regions of dvCAs showing ventral migrated cells (GFP)  
420 and neurons (TBR1 and SATB2, white). Scale bar: 50  $\mu\text{m}$ .

421 D. Quantification of the percentage of migrated GFP ventral cells expressing TBR1 and SATB2 in  
422 dvCAs. Box plots show median and interquartile range. Significance was based on the Mann-Whitney  
423 U test  $**p<0.01$ ,  $****p<0.0001$ . Every dot in the plots refers to analyzed ventricles per vCO from at  
424 least 3 different vCOs generated in at least 2 independent batches.

425 E. Schematic overview of experimental set-up for time-lapse live imaging in dvCAs (top) and examples  
426 of the GFP+ ventral cells movements in dorsal region of dvCAs, monitored for 48h (bottom). Scale bar:  
427 80  $\mu\text{m}$ .

428 F. Quantification of velocity (top), number of resting time points (middle) and tortuosity index (bottom)  
429 of migrating GFP+ventral cells. Box plots show median and interquartile range. Statistical significance  
430 was based on the Mann-Whitney U test  $*p<0.05$ ,  $**p<0.01$ ,  $****p<0.0001$ . Every dot in the plots refers  
431 to single cells per vCO.

432

433

434 **Fig 4 Extrinsic effect of LGALS3BP in ventral progenitor fate and neuronal specification**

435 A. Schematic of experimental set-up of generation and processing of vMOs.

436 B-C. UMAP visualization of scRNA-seq clusters of vMOs (n= 5369 cells from a pool of 5 organoids).

437 D. Feature plot depicting the expression of progenitor markers (TOP2A), IPs markers (TTYH1, NKX2-  
438 1, ASCL1), neurons (DLX5, MAP2, TBR1, NEUROG1, GLI3, SLC12A6) in vMOs.

439 E. Dotplot of cortical genes expressed in vMO clusters.

440 F-G. UMAP visualization of pseudo-time trajectories in vMOs from progenitors to INs.

441

442 **Fig 5 LGALS3BP can revert the molecular identity of mutant ventral progenitors and neurons**

443 A. Schematic of experimental set-up of cluster analysis of CTRL dCOs (d-CTRL), CTRL vCOs (v-  
444 CTRL), E370K vCOs (v-E370K) and vMOs (vMOs-CTRL and -E370K).

445 B-C. UMAP visualization of scRNA-seq clusters of CTRL dCOs, CTRL vCOs, E370K vCOs and  
446 vMOs.

447 D. Feature plot depicting the expression of progenitor marker (TOP2A), IPs marker (TTYH1), neuronal  
448 marker (MAP2).

449 E. Boxplot showing the dorso-ventral prediction score of progenitors, IP, and neurons in all conditions.

450 Box plots show median and interquartile range.

451 F. Expression level of ventral (NKX2-1 and DLX5) and dorsal (GLI3 and POU3F2) genes along the

452 pseudo-time axis in each condition.

453

454 **Fig 6 Extrinsic function of LGALS3BP in progenitor specification and neuronal migration**

455 A. Schematic of experimental set-up of proteomic analysis of EVs collected from vCOs.

456 B. Venn diagram showing number of proteins detected in vCO and E370K-vCO EVs.

457 C. Volcano plot of protein level of vCO and E370K-vCO EVs, plotting the negative log<sub>10</sub> q-values

458 (FDR) of all proteins against their log<sub>2</sub> fold change (E370K-vCO EVs vs vCOs). Significantly

459 expressed proteins (q-value < 0.05) are labelled.

460 D. Schematic of acute treatment (12 h) of NPCs with vEVs collected from CTRL and E370K COs (top)

461 and GO terms of upregulated pathways (bottom).

462 E-G. Gene networks of WNT, NOTCH and axon guidance pathways upregulated in NPCs upon

463 treatment with E370K-vEVs

464

465

466

467

468

469

470

471

472

473

474

475

476

477

478

479 **Materials and methods**

480

481 **iPSCs culture**

482 Induced pluripotent stem cells (iPSCs) reprogrammed from NuFF3-RQ human new-born foreskin  
483 feeder fibroblasts (GSC-3404, GlobalStem) (Cárdenas et al., 2018) were cultured on Matrigel (Corning)  
484 coated plates (Thermo Fisher, Waltham, MA, USA) in mTesR1 basic medium supplemented with 1x  
485 mTesR1 supplement (Stem Cell Technologies, Vancouver, Canada) at 37°C, 5% CO<sub>2</sub> and ambient  
486 oxygen level. Passaging was done using accutase (Stem Cell Technologies) treatment.

487

488 **CRISPR genome editing for generation of mutant iPSCs lines**

489 For CRISPR genome editing for the generation of mutant iPSCs, one control iPSC line was used to  
490 generate isogenic control and mutant lines as described in Kyrousi et al., 2021.

491

492 **Generation of labeled iPSC line**

493 The GFP and RFP-labeled iPSC lines were generated using the piggyBac transposase (1ug) and PB-  
494 GFP (1ug)(Di Matteo et al., 2020) and PB-RFP (1ug) nucleofection(Chen and LoTurco, 2012). Single  
495 cells of iPSCs were transfected with the Amaxa Nucleofector 2b (program B-016). GFP and RFP  
496 colonies were picked and cultured on Matrigel (Corning/VWR International, 354234) coated plates in  
497 mTeSR1 basic medium (Stem Cell Technologies, 85850) supplemented with 1× mTeSR1 supplement  
498 (Stem Cell Tech- nologies, 85850) at 37°C and 5% CO<sub>2</sub>.

499

500 **Generation of dvCAs and vCOs**

501 Dorso-ventral CAs and vCOs were generated according to Bagley et al, 2017(Bagley Joshua A ,  
502 Reumann Daniel , Bian Shan, 2017). Embryoid bodies (EBs) were guided to generate ventral and dorsal  
503 identities. iPSCs from isogenic control and mutant lines, were dissociating into single cells using  
504 Accutase (Sigma-Aldrich, A6964) and approximately 9,000 cells were transferred to one well of an  
505 ultra-low-attachment 96-well plate (Corning). Five days later, during the neuronal induction, to induce  
506 brain regional patterning, EBs were treated individually with SAG (1:10,000) (Milli- pore, 566660) +  
507 IWP-2 (1:2,000) (Sigma-Aldrich, I0536) for ventral identity and with cyclopamine A (1:500)  
508 (Calbiochem, 239803) for dorsal identity. After 7 days, one ventral EB and one dorsal EB were  
509 embedded together into the same Matrigel (Corning/VWR International, 354234) droplet in order to  
510 form a fused organoid. The ventrally patterned EBs were embedded separately, each in one drop of  
511 Matrigel. After this point, the generation of vCOs followed methods according to Lancaster &  
512 Knoblich, 2017(Lancaster et al., 2017).

513

514 **Generation of vMOs**

515 Ventral MOs were generated according to Bagley et al, 2017. iPSCs from isogenic control and from  
516 GFP labelled E370k line, were dissociating into single cells using Accutase (Sigma-Aldrich, A6964)  
517 and approximately 4,500 cells of each line were mixed together and transferred to one well of an ultra-  
518 low-attachment 96-well plate (Corning), in a ratio of 1:1. The protocols continues as described in  
519 "Generation of dvCAs and vCOs".

520

### 521 **Immunohistochemistry**

522 For IHC, sections were post-fixed using 4% PFA for 10 min and permeabilized with 0.3% Triton for 5  
523 min. After post-fixation and permeabilization, sections were blocked with 0.1% Tween, 10% Normal  
524 Goat Serum (Biozol, VEC-S-1000). Primary and secondary antibodies were diluted in blocking  
525 solution. Nuclei were visualized using 0.5 mg/ml 4,6-diamidino-2-phenylindole (DAPI) (Sigma-  
526 Aldrich, D9542). Immunostained sections were analyzed using Leica TCS SP8 Confocal microscope  
527 (Leica, Germany). For nuclear antibodies, before the post-fixation step, sections were incubated in a  
528 freshly made 10 mM citric buffer (pH 6) in a microwave for 1 min at 720 W and for 10 min at 120 W  
529 and then left it to cool down for 20 min at RT. Cells quantifications were performed with the ImageJ  
530 software and analyzed with RStudio or GraphPad.

531

### 532 **hCOs 3D immunohistochemistry and tissue clearing**

533 The dvCAs 3D immunohistochemistry and tissue clearing were performed following Masselink et  
534 al.,2019. For immunohistochemistry, fused organoids were fixed in 4% PFA overnight at 4C. They  
535 were incubated on a shaker for 2 days in PBS-TxDBN solution (10%PBS10X, 2% TX100, 20% DMSO,  
536 5%BSA, 0.05% NaN). Primary and secondary antibodies were diluted in PBS-TxDBN solution and  
537 incubated for 4 days. For the following dehydration step, the organoids were transferred sequentially in  
538 30%, 50%, 70% and 2x 99.7% in 1-Propanol(Sigma Cat.W292818):1xPBS (pH:9) solutions.  
539 Dehydration is performed at 4C on a gyratory rocker for at least 4h per step. For the refractive index  
540 matching, the organoids were transferred into Ethyl-Cinnamate (Sigma Cat. W243000) solution and  
541 incubated on a gyratory rocker at RT for at least 1h before recording. The imaging was performed using  
542 Leica TCS SP8 Confocal microscope (Leica, Germany). The cells were counted using Imaris software  
543 and analyzed with RStudio.

544

### 545 **hCOs 3D time-lapse imaging**

546 For 3D time-lapse imaging, slices of dvCAs were prepared and imaged as described previously(Pilz et  
547 al., 2013). Dorso-ventral CAs were sliced at 300- $\mu$ m thickness on a vibratome (Leica VT1200S) in ice-  
548 cold DMEM/F12 (Invitrogen) supplement with sodium bicarbonate, glucose and 10% antibiotics,  
549 oxygenated with 100% O<sub>2</sub> for 20 min before cutting. The slices were placed on a cell culture insert  
550 (Millicell) and further cultured in normal organoid medium. The slices were kept in an atmosphere with  
551 5% CO<sub>2</sub> at 37 °C. Live imaging was performed for 48 h using Leica TCS SP8 Confocal microscope



552 (Leica, Germany), taking an image every twenty minutes. The cell movement was tracked using ImageJ  
553 software and the Manual Tracking Plugin, and the movement parameters calculated and analyzed in  
554 RStudio.

555

### 556 **Single-cell RNA-sequencing library preparation and data analysis**

557 Five 60 days old vCOs and vMCOs were randomly selected from each condition. Single cells were  
558 dissociated using StemPro Accutase Cell Dissociation Reagent (Life Technologies), filtered through 30  
559  $\mu$ M and 20  $\mu$ M filters (Miltenyi Biotec) and cleaned of debris using a Percoll (Sigma, P1644) gradient.  
560 For vMCOs, single cells were FACS sorted to collect control and GFP-labeled E370K single cells.  
561 Single cells were resuspended in ice-cold Phosphate-Buffered Saline (PBS) supplemented with 0.04%  
562 Bovine Serum Albumin at a concentration of 1000 cells per  $\mu$ l. Single cells were loaded onto a  
563 Chromium Next GEM Single Cell 3' chip (Chromium Next GEM Chip G Single Cell Kit, 16 rxns  
564 10XGenomics PN-1000127) with the a Chromium Next GEM Single Cell 3' GEM, Library & Gel Bead  
565 Kit v3.1 (Chromium Next GEM Single Cell 3' GEM, Library & Gel Bead Kit v3.1, 4 rxns 10xGenomics  
566 PN-1000128) and cDNA libraries were generated with the Single Index Kit T Set A, 96 rxns  
567 (10xGenomics PN-1000213) according to the manufacturer's instructions. Libraries were sequenced  
568 using Illumina NovaSeq6000 in 28/8/91bp mode (SP flowcell), quality control and UMI counting were  
569 performed by the Max-Planck für molekulare Genetik (Germany). Downstream analysis was performed  
570 using the R package Seurat (version 3.2). Cells with more than 2,500 or less than 200 detected genes or  
571 with mitochondrial content higher than 10% were excluded as well as genes that were not expressed in  
572 at least three cells. We excluded clusters with "glycolysis" identity based on GO terms of cluster-  
573 specific markers genes(Bhaduri et al., 2020)(Kanton et al., 2019). Normalization of gene expression  
574 was done using a global-scaling normalization method ("LogNormalize", scale.factor = 10000) and the  
575 2000 most variable genes were selected (selection method, "vst") and scaled (mean = 0 and variance =  
576 1 for each gene) before principal component analysis. The "FindNeighbors" and "FindClusters"  
577 functions were used for clustering with resolution of 0.5 and UMAP for visualization. Clusters were  
578 grouped based of the expression of known marker genes and differentially expressed gene identified  
579 with the "FindAllMarkers" function. The PCA analysis was used to determine pseudo-differentiation  
580 axis of telencephalic cells. For pseudotime analysis, we used Monocle3 algorithm(Trapnell et al., 2014)  
581 which identifies the overall trajectory of gene expression changes.

582

### 583 **FACS analysis**

584 Single cells obtained after dissociation of 60 days old vMOs were collected for FACS analysis ("see  
585 Single-cell RNA-sequencing library preparation and data analysis"), in order to sort control and GFP-  
586 labeled E370K for single-cell RNA-seq analysis. FACS analysis was performed at a FACS Aria (BD)  
587 in BD FACS Flow TM medium, with a nozzle diameter of 100  $\mu$ m. For each run, 10,000 cells were  
588 analyzed.

589

### 590 **Dorso-ventral identity model**

591 The model implemented in the bmrn R package was used to classify the identity of cells with genes  
592 showing minimal expression (10,407), as described in Oberst et al., 2019 (Oberst et al., 2019). The  
593 model was trained with a subset of dorsal and ventral control cells and the 30 most-weighted genes  
594 were used for fold cross validation of additional dorsal and ventral control cells and prediction of dorsal  
595 and ventral mutant cells. The same method was applied to build a model to classify control and mutant  
596 cells, selecting for 100 most-weighted genes.

597

### 598 **EVs collection and analysis**

599 EVs were collected from conditioned media from ventral and dorsal COs by the following steps:  
600 centrifugation in 300 g for 15 mins, supernatant centrifugation in 2000g for 10 mins, supernatant  
601 centrifugation in 10.000 g for 30 mins, supernatant centrifugation in 100.000 g for 120 mins and pellet  
602 wash with 1x PBS and centrifugation in 100.000 g for 60 mins. Alternatively, miRCURY Exosome  
603 Cell/Urine/CSF Kit (Qiagen, 76743) was used to isolate EVs from conditioned medium according to  
604 the manufacturer instructions.

605

### 606 **Sample preparation for mass spectrometry**

607 Purified EVs were lysed in RIPA buffer (150mM NaCl, 50mM Tris pH8, 0.1% DOC, 0.1% SDS, 0.1%  
608 NP40). 10 ug of protein for each sample was subjected to the modified FASP protocol (Wiśniewski et  
609 al., 2009). Briefly, the protein extract was loaded onto the centrifugal filter CO10 kDa (Merck Millipore,  
610 Darmstadt, Germany), and detergent were removed by washing five times with 8M Urea (Merck,  
611 Darmstadt, Germany) 50mM Tris (Sigma-Aldrich, USA) buffer. Proteins were reduced by adding 5mM  
612 dithiothreitol (DTT) (Bio-Rad, Canada) at 37degrees C for 1 hour in the dark. To remove the excess of  
613 DTT, the protein sample was washed three times with 8M Urea, 50mM Tris. Subsequently protein thiol  
614 groups were blocked with 10mM iodoacetamide (Sigma-Aldrich, USA) at RT for 45 min. Before  
615 proceeding with the enzymatic digestion, urea was removed by washing the protein suspension three  
616 times with 50mM ammonium bicarbonate (Sigma-Aldrich, Spain). Proteins were digested first by Lys-  
617 C (Promega, USA) at RT for 2 hours, then by trypsin (Premium Grade, MS Approved, SERVA,  
618 Heidelberg, Germany) at RT, overnight, both enzymes were added at an enzyme-protein ratio of 1:50  
619 (w/w). Peptides were recovered by centrifugation followed by two additional washes with 50mM  
620 ammonium bicarbonate and 0.5M NaCl (Sigma-Aldrich, Switzerland). The two filtrates were  
621 combined, the recovered peptides were lyophilized under vacuum. Dried tryptic peptides were desalted  
622 using C18-tips (Thermo Scientific, Pierce, USA), following the manufacture instructions. Briefly, the  
623 peptides dissolved in 0.1%(v/v) formic acid (Thermo scientific, USA) were loaded onto the C18-tip and  
624 washed 10 times with 0.1 % (v/v) formic acid, subsequently the peptides were eluted by 95% (v/v)  
625 acetonitrile (Merck, Darmstadt, Germany), 0.1% (v/v) formic acid. The desalted peptides were

626 lyophilized under vacuum. The purified peptides were reconstituted in 0.1% (v/v) formic acid for LC-  
627 MS/MS analysis.

628

### 629 **MS data acquisition**

630 Desalted peptides were loaded onto a 25 cm, 75  $\mu$ m ID C18 column with integrated nanospray emitter  
631 (Odyssey/Aurora, ionopticks, Melbourne) via the autosampler of the Thermo Easy-nLC 1000 (Thermo  
632 Fisher Scientific) at 60 °C. Eluting peptides were directly sprayed onto the timsTOF Pro (Bruker  
633 Daltonics). Peptides were loaded in buffer A (0.1% (v/v) formic acid) at 400 nl/min and percentage of  
634 buffer B (80% acetonitril, 0.1% formic acid) was ramped from 5% to 25% over 90 minutes followed  
635 by a ramp to 35% over 30 minutes then 58% over the next 5 minutes, 95% over the next 5 minutes and  
636 maintained at 95% for another 5 minutes. Data acquisition on the timsTOF Pro was performed using  
637 timsControl. The mass spectrometer was operated in data-dependent PASEF mode with one survey  
638 TIMS-MS and ten PASEF MS/MS scans per acquisition cycle. Analysis was performed in a mass scan  
639 range from 100-1700 m/z and an ion mobility range from  $1/K0 = 0.85$  Vs cm<sup>-2</sup> to  $1.30$  Vs cm<sup>-2</sup> using  
640 equal ion accumulation and ramp time in the dual TIMS analyzer of 100 ms each at a spectra rate of  
641 9.43 Hz. Suitable precursor ions for MS/MS analysis were isolated in a window of 2 Th for  $m/z < 700$   
642 and 3 Th for  $m/z > 700$  by rapidly switching the quadrupole position in sync with the elution of  
643 precursors from the TIMS device. The collision energy was lowered as a function of ion mobility,  
644 starting from 45 eV for  $1/K0 = 1.3$  Vs cm<sup>-2</sup> to 27eV for  $0.85$  Vs cm<sup>-2</sup>. Collision energies were  
645 interpolated linear between these two  $1/K0$  values and kept constant above or below these base points.  
646 Singly charged precursor ions were excluded with a polygon filter mask and further  $m/z$  and ion  
647 mobility information was used for 'dynamic exclusion' to avoid re-sequencing of precursors that reached  
648 a 'target value' of 14500 a.u. The ion mobility dimension was calibrated linearly using three ions from  
649 the Agilent ESI LC/MS tuning mix ( $m/z$ ,  $1/K0$ : 622.0289, 0.9848 Vs cm<sup>-2</sup>; 922.0097 Vs cm<sup>-2</sup>, 1.1895  
650 Vs cm<sup>-2</sup>; 1221.9906 Vs cm<sup>-2</sup>, 1.3820 Vs cm<sup>-2</sup>).

651

### 652 **Raw data analysis of MS measurements**

653 Raw data were processed using the MaxQuant computational platform (version 1.6.17.0)(Tyanova et  
654 al., 2016) with standard settings applied for ion mobility data(Prianichnikov et al., 2020). Shortly, the  
655 peak list was searched against the Uniprot database of Human database (75069 entries, downloaded in  
656 July 2020) with an allowed precursor mass deviation of 10 ppm and an allowed fragment mass deviation  
657 of 20 ppm. MaxQuant by default enables individual peptide mass tolerances, which was used in the  
658 search. Cysteine carbamidomethylation was set as static modification, and methionine oxidation,  
659 deamidation and N-terminal acetylation as variable modifications. The match-between-run option was  
660 enabled, and proteins were quantified across samples using the label-free quantification algorithm in  
661 MaxQuant generating label-free quantification (LFQ) intensities. The mass spectrometry proteomics

662 data have been deposited to the ProteomeXchange Consortium via the PRIDE(Perez-Riverol et al.,  
663 2019).

#### 664 **Bioinformatic analysis**

665 For the proteomic characterization in EVs, 3427 proteins were quantified. Proteins that were  
666 consistently detected in 2 of the 3 technical replicates per each condition were retained. Downstream  
667 analysis was performed using R. The LFQs values were log<sub>2</sub>-transformed. Missing values were imputed  
668 using the R package DEP (version 1.15.0) and replaced by random values of a left-shifted Gaussian  
669 distribution (shift of 1.8 units of the standard deviation and a width of 0.3). Differentially expression  
670 (DE) analysis was performed on the imputed data using Student's t-Test. Proteins with log<sub>2</sub> fold change  
671 values (log<sub>2</sub>FC)  $\geq 1$  and  $\leq -1$  and with an FDR-corrected q-value  $< 0.05$  were considered as  
672 differentially expressed. The gene-disease associations analysis was performed using DisGeNET  
673 (<https://www.disgenet.org/search>)(Piñero et al., 2017).

674

#### 675 **Bulk-RNA-sequencing**

676 RNA-seq was performed on 10ng of total RNA collected from 3 independent wells of NPCs from a  
677 24well plate. NPCs were not treated with EVs or treated for 12h with EVs collected by  
678 ultracentrifugation from 25 ml of conditioned medium collected from 28 to 37 days in culture COs  
679 (control ventral, EPM1 ventral, control dorsal and EPM1 dorsal COs). NPCs were lysed in 1ml  
680 Trizol(Qiagen)/well and RNA was isolated employing RNA Clean & Concentrator kit (Zymo Research)  
681 including digestion of remaining genomic DNA according to producer's guidelines. RNA was further  
682 processed according to(Cernilogar et al., 2019). Briefly, cDNA synthesis was performed with SMART-  
683 Seq v4 Ultra Low Input RNA Kit (Clontech cat. 634888) according to the manufacturer's instruction.  
684 cDNA was fragmented to an average size of 200–500 bp in a Covaris S220 device (5 min; 4°C; PP 175;  
685 DF 10; CB 200). Fragmented cDNA was used as input for library preparation with MicroPlex Library  
686 Preparation Kit v2 (Diagenode, cat. C05010012) and processed according to the manufacturer's  
687 instruction. Libraries were quality controlled by Qubit and Agilent DNA Bioanalyzer analysis. Deep  
688 sequencing was performed on a HiSeq 1500 system according to the standard Illumina protocol for 50  
689 bp paired-end reads with v3 sequencing reagents.

690

#### 691 **RNAseq analysis**

692 Paired end reads were aligned to the human genome version GRCh38 using STAR v2.6.1d(Dobin et  
693 al., 2013) with default options "--runThreadN 32 --quantMode TranscriptomeSAM GeneCounts --  
694 outSAMtype BAM SortedByCoordinate". Reads-per-gene counts were imported in R v4.1.0.  
695 Bioconductor package DESeq2 v1.32.0(Love et al., 2014) was used for differential expression analysis.  
696 Only genes with read counts $>1$  were considered. Significantly changed genes were determined through  
697 pairwise comparisons using the DESeq2 results function (log<sub>2</sub> fold change threshold=1, adjusted p-

698 value <0.05). Heatmaps with differentially expressed genes were plotted with pheatmap v1.0.12 and  
699 RColorBrewer v1.1-2 using rlog-normalized expression values.

#### 700 **Enrichment analysis**

701 GO term analysis of differentially-expressed genes in mutant patterned hCOs was tested using the  
702 FUMA algorithm(Watanabe et al., 2017) by inserting the DE gene lists from all the cell populations  
703 into the GENE2FUNC software (FDR<0.05) or STRING.

704

705 Table 1. Immunostaining antibodies

| Primary antibodies |            |                             |               |             |          |
|--------------------|------------|-----------------------------|---------------|-------------|----------|
| Antibody           | Host       | Company                     | Catalogue No. | Lot No.     | Dilution |
| NKX2.1             | Mouse IgG1 | Merk<br>Millipore           | MAB5460       | 3160139     | 1:500    |
| TBR1               | Rabbit     | Abcam                       | Ab31940       | GR3217067-1 | 1:500    |
| SOX2               | Rabbit     | Cell Signaling              | 27485         | 2           | 1:500    |
| LGALS3BP           | Mouse IgG1 | eBioscience                 | BMS146        | -           | 1:100    |
| PAX6               | Rabbit     | Biolegend                   | PRB-278p      | B244513     | 1:500    |
| MEIS2              | Mouse IgG1 | Santa Cruz<br>Biotechnology | SC 101850     | H0817       | 1:300    |
| EOMES              | Rabbit     | Abcam                       | ab23345       | GR33045451  | 1:500    |
| SATB2              | Mouse IgG1 | Abcam                       | Ab51502       | GR2075794   | 1:500    |
| CALB2              | Rabbit     | Swang                       | 7697          | -           | 1:1000   |
| GFP                | Chicken    | Aves Lab                    | GFP-1020      | 697986      | 1:1000   |

706

| Secondary antibodies |            |                            |               |         |          |
|----------------------|------------|----------------------------|---------------|---------|----------|
| Antibody             | Host       | Company                    | Catalogue No. | Lot No. | Dilution |
| AlexaFluor647        | Rabbit     | ThermoFisher<br>Scientific | A21244        | 2086730 | 1:1000   |
| AlexaFluor488        | Chicken    | ThermoFisher<br>Scientific | A11039        | 2147635 | 1:1000   |
| AlexaFluor546        | Mouse IgG1 | ThermoFisher<br>Scientific | A21123        | 1722393 | 1:1000   |

|               |        |                            |        |         |        |
|---------------|--------|----------------------------|--------|---------|--------|
| AlexaFluor488 | Rabbit | ThermoFisher<br>Scientific | A11008 | 2079383 | 1:1000 |
|---------------|--------|----------------------------|--------|---------|--------|

707

708 **Acknowledgments:** we thank Maik Ködel, Anthi Krontira, Pablo Lopez, Cristiana Cruceanu, Filippo  
709 Cernilogar, Sylvain Moser, Francesco Di Matteo, Andrea Forero, Veronica Pravata, Giovanna Berto  
710 for technical help and critical discussion.

711 **Funding:** this project is supported by Max Planck Society, ERA-Net E-Rare (HETEROMICS ERARE  
712 18-049) and DFG (CA 1205/4-1 | RU 1232/7-1).

713 **Author contributions:** Conceptualization: SC, FP. Methodology: FP, NB, CK, RDG, RB.  
714 Investigation: SC, FP, NB, RDG. Visualization: FP. Funding acquisition: SC. Supervision: SC, DJ.  
715 Writing: original draft: FP; review & editing: SC, FP.

716 **Conflict of interests:** Authors declare that they have no competing interests.

717

718

719

720

721

722

723

724

725

726

727

728

729

730

731

732



733 **Expanded View Figure legends**

734

735 **Fig EV1**

736 A. Schematic of differentiation protocol used for vCOs and dvCAs (top) and Schematic of tangential  
737 migration of interneurons from MGE and CGE to the cortex and markers used for forebrain regional  
738 characterization.

739 B. Representative immunostaining for regional markers in dvCAs (NKX2.1 for ventral and TBR1 for  
740 dorsal regions). Scale bar: 50  $\mu$ m.

741 C. Schematic representation of the E370K and Y366Lfs mutant iPSC lines generated using the  
742 CRISPR/Cas9 genome editing in control iPSCs.

743 D. Representative immunostaining of CTRL and Y366Lfs vCOs for SOX2 (green) and LGALS3BP  
744 (magenta). Scale bar: 50  $\mu$ m.

745 E. Representative immunostaining of CTRL and Y366Lfs vCOs for cortical markers of IPs (EOMES)  
746 of deep layer neurons (TBR1) and upper layer neurons (SATB2). Scale bar: 50  $\mu$ m.

747 F. Quantification of TBR1+cells in ventral region of CTRLv-CTRLd and E370v-CTRLd dvCAs. Box  
748 plots show median and interquartile range. Statistical significance was based on Mann-Whitney U  
749 test \* $p < 0.05$ , \*\*\* $p < 0.001$ . n of organoids: CTRLv-CTRLd =5, LGALS3BPv-CTRLd=9, from at least 2  
750 different batches.

751

752 **Fig EV2**

753 A. Dotplot of cortical genes expressed in vCO clusters.

754 B. PCA visualization and of CTRL and E370K vCOs, showing the pseudo-differentiation axis from  
755 progenitors to INs.

756 C. UMAP visualization of scRNA-seq ventral telencephalic cells in CTRL and E370K vCOs.

757 D-E. UMAP visualization of pseudo-differentiation trajectories in CTRL vCOs and in E370K clusters  
758 from progenitors to INs.

759 F. Bar plot showing cell proportion in CTRL and E370K vCOs.

760 G. Density plot showing cell distribution along pseudo-differentiation axis in CTRL and E370K vCOs.

761 H. Box plot showing cell distribution along pseudo-differentiation axis in CTRL and E370K vCOs per  
762 each cluster.

763 I-K. GO enrichment for DE genes in progenitors, IP and MGE and INs. GO for biological process are  
764 reported.

765

766 **Fig EV3**

767 A. Quantification of the number of GFP+ventral cells migrated from ventral to dorsal in dvCAs. Box  
768 plots show median and interquartile range. Significance was based on the Mann-Whitney U test. Every  
769 dot in the plots refers to analyzed vCAs generated in at least 2 independent batches.

770 B. Representative 3D immunostaining of CTRLv-CTRLd and E370Kv-CTRLd dvCAs for GFP and  
771 TBR1. Scale bar: 500  $\mu$ m.

772 C. Quantification of TBR1+cells in ventral region of CTRLv-CTRLd and E370v-CTRLd dvCAs. Box  
773 plots show median and interquartile range. Statistical significance was based on Mann-Whitney U  
774 test \* $p < 0.05$ , \*\*\* $p < 0.001$ . n of organoids: CTRLv-CTRLd =5, LGALS3BPv-CTRLd=9, from at least 2  
775 different batches (top) and quantification of migrated GFP+ventral cells expressing TBR1 in dorsal  
776 region of CTRLv-CTRLd and E370v-CTRLd dvCAs. Box plots show median and interquartile range.  
777 Statistical significance was based on Mann-Whitney U test \* $p < 0.05$ , \*\*\* $p < 0.001$ . n of organoids:  
778 CTRLv-CTRLd =5, LGALS3BPv-CTRLd=9, from at least 2 different batches (bottom).

779 D. Feature plot depicting the expression of genes associated with PH (GNG5, ROBO3, DCC, OCIAD2,  
780 PAX6, NHLH1, SOX5, NELL2) in vCOs.  
781 E. Volcano plot showing the fold change (CTRL vs E370K) of gene expression of PH-associated genes  
782 in E370K neurons.  
783 F. Graph showing the comparison between velocity (um/min) of CTRL dorsal neurons (analyzed in  
784 Klaus et al., 2019(Klaus et al.)), E370K ventral neurons and CTRL ventral neurons migrating within  
785 the dorsal region. Data are shown mean  $\pm$  SEM Statistical significance was based on the Mann-Whitney  
786 U test \* $p < 0.05$ . Every dot in the plots refers to single cells per vCO.

787  
788

#### 789 **Fig EV4**

790 A. PCA visualization and of vMOs, showing the pseudo-differentiation trajectory from progenitors to  
791 INs.  
792 B-C. UMAP visualization of scRNA-seq ventral telencephalic cells clusters in vMOs.  
793 D. Bar plot showing cell proportion in vMOs.  
794 E. Density plot showing cell distribution along pseudo-differentiation axis in vMOs.  
795 F. Box plot showing cell distribution along pseudo-differentiation axis in vMCOs per each cluster.  
796 G. Volcano plot showing the fold change (CTRL vs E370K) of gene expression in progenitors in  
797 vMCOs.

798

#### 799 **Fig EV5**

800 A. Box plot showing the dorso-ventral prediction score based on fold cross validation.  
801 B. UMAP visualization of scRNA-seq clusters of CTRL dCOs, CTRL vCOs, E370K vCOs and vMOs.  
802 C. Boxplot showing the dorso-ventral prediction score of CTRL dCOs, CTRL vCOs, E370K vCOs and  
803 vMOs cells. Box plots show median and interquartile range.  
804 D. Density plot showing the distribution of dorso-ventral prediction score of each condition along the  
805 pseudo-differentiation axis.  
806 E. VoxHunt spatial brain mapping of the scRNA-seq from all conditions onto data from E13.5 mouse  
807 brains from the Allen Brain Institute.

808  
809

#### 810 **Fig EV6**

811 A. PCA plot of protein samples from EVs collected from CTRL and E370K vCOs, based on LFQ  
812 intensity of quantified proteins. All the replicates are represented.  
813 B. Bar plot showing the number of proteins detected in vEVs and E370K-vEVs.  
814 C. Bar plot of LGALS3BP protein level detected in vEVs and E370K-vEVs.  
815 D. Heatmap showing transcriptomic profile changes in NPCs after treatment with E370K-vEVs  
816 E-G. Heatmap of DE protein in and E370K-vEVs associated with MCD, epilepsy and ASD.

817

818

819

820

821

822

823

824

825 **References**

- 826 Altmann, C.R., and Brivanlou, A.H. (2001). Neural patterning in the vertebrate embryo. *Int.*  
827 *Rev. Cytol.* *203*, 447–482.
- 828 Amin, S., and Borrell, V. (2020). The Extracellular Matrix in the Evolution of Cortical  
829 Development and Folding. *Front. Cell Dev. Biol.* *8*.
- 830 Ariza, J., Rogers, H., Hashemi, E., Noctor, S.C., and Martínez-cerdeño, V. (2018). The  
831 Number of Chandelier and Basket Cells Are Differentially Decreased in Prefrontal Cortex in  
832 Autism. 411–420.
- 833 Bagley, J.A., Reumann, D., Bian, S., Lévi-Strauss, J., and Knoblich, J.A. (2017). Fused  
834 cerebral organoids model interactions between brain regions. *Nat. Methods*.
- 835 Bagley Joshua A , Reumann Daniel , Bian Shan, J.A.K. (2017). Fused dorsal-ventral cerebral  
836 organoids model human cortical interneuron migration. *BioRxiv*.
- 837 Bajaj, S., Bagley, J.A., Sommer, C., and Vertesy, A. (2021). Neurotransmitter signaling  
838 regulates distinct phases of multimodal human interneuron migration. 1–21.
- 839 Bellion, A., Baudoin, J.P., Alvarez, C., Bornens, M., and Métin, C. (2005). Nucleokinesis in  
840 tangentially migrating neurons comprises two alternating phases: Forward migration of the  
841 Golgi/centrosome associated with centrosome splitting and myosin contraction at the rear. *J.*  
842 *Neurosci.* *25*, 5691–5699.
- 843 Bhaduri, A., Andrews, M.G., Mancía Leon, W., Jung, D., Shin, D., Allen, D., Jung, D.,  
844 Schmunk, G., Haeussler, M., Salma, J., et al. (2020). Cell stress in cortical organoids impairs  
845 molecular subtype specification. *Nature* *578*, 142–148.
- 846 Birey, F., Andersen, J., Makinson, D., Islam, S., Wei, W., Huber, N., Christina Fan, H.,  
847 Cordes Metzler, K.R., Panagiotakos, G., Thom, N., et al. (2017). Assembly of functionally  
848 integrated human forebrain spheroids Generation of subdomain-specific forebrain spheroids.  
849 *Nat. Publ. Gr.* *545*.
- 850 Buchsbaum, I.Y., and Cappello, S. (2019). Neuronal migration in the CNS during  
851 development and disease: insights from in vivo and in vitro models.
- 852 Buzzi, A., Chikhladze, M., Falcicchia, C., Paradiso, B., Lanza, G., Soukupova, M., Marti, M.,  
853 Morari, M., Franceschetti, S., and Simonato, M. (2012). Neurobiology of Disease Loss of  
854 cortical GABA terminals in Unverricht – Lundborg disease. *Neurobiol. Dis.* *47*, 216–224.
- 855 Cernilogar, F.M., Hasenöder, S., Wang, Z., Scheibner, K., Burtscher, I., Sterr, M.,

- 856 Smialowski, P., Groh, S., Evenroed, I.M., Gilfillan, G.D., et al. (2019). Pre-marked chromatin  
857 and transcription factor co-binding shape the pioneering activity of Foxa2. *Nucleic Acids*  
858 *Res.* *47*, 9069–9086.
- 859 Chen, F., and LoTurco, J. (2012). A method for stable transgenesis of radial glia lineage in rat  
860 neocortex by piggyBac mediated transposition. *J. Neurosci. Methods* *207*, 172–180.
- 861 Chi, L., Fan, B., Feng, D., Chen, Z., Liu, Z., Hui, Y., Xu, X., Ma, L., Fang, Y., Zhang, Q., et  
862 al. (2017). The Dorsoventral Patterning of Human Forebrain Follows an  
863 Activation/Transformation Model. *Cereb. Cortex* *27*, 2941–2954.
- 864 Dobin, A., Davis, C.A., Schlesinger, F., Drenkow, J., Zaleski, C., Jha, S., Batut, P., Chaisson,  
865 M., and Gingeras, T.R. (2013). STAR: Ultrafast universal RNA-seq aligner. *Bioinformatics*  
866 *29*, 15–21.
- 867 Džaja, D., Hladnik, A., and Bi, I. (2014). Neocortical calretinin neurons in primates : increase  
868 in proportion and microcircuitry structure. *8*, 1–6.
- 869 Fernández, V., Llinares-benadero, C., and Borrell, V. (2016). Cerebral cortex expansion and  
870 folding : what have we learned ? *35*, 1021–1044.
- 871 Fietz, S.A., and Huttner, W.B. (2010). Cortical progenitor expansion , self-renewal and  
872 neurogenesis — a polarized perspective. *Curr. Opin. Neurobiol.* 1–13.
- 873 Fleck, J.S., Sanchís-Calleja, F., He, Z., Santel, M., Boyle, M.J., Camp, J.G., and Treutlein, B.  
874 (2021). Resolving organoid brain region identities by mapping single-cell genomic data to  
875 reference atlases. *Cell Stem Cell* *28*, 1148-1159.e8.
- 876 Fuccillo, M., Rutlin, M., and Fishell, G. (2006). Removal of Pax6 partially rescues the los of  
877 ventral structures in Shh null mice. *Cereb. Cortex* *16*, 96–102.
- 878 Guo, J., and Anton, E.S. (2014). Decision making during interneuron migration in the  
879 developing cerebral cortex. *Trends Cell Biol.* *24*, 342–351.
- 880 Hayward, P., Kalmar, T., and Arias, A.M. (2008). Wnt/Notch signalling and information  
881 processing during development. *Development* *135*, 411–424.
- 882 Jiang, X., Charlat, O., Zamponi, R., Yang, Y., and Cong, F. (2015). Dishevelled promotes  
883 wnt receptor degradation through recruitment of znr3/rnf43 e3ubiquitin ligases. *Mol. Cell*  
884 *58*, 522–533.
- 885 Kanton, S., Boyle, M.J., He, Z., Santel, M., Weigert, A., Sanchís-Calleja, F., Guijarro, P.,  
886 Sidow, L., Fleck, J.S., Han, D., et al. (2019). Organoid single-cell genomic atlas uncovers

887 human-specific features of brain development.

888 Kepecs, A., and Fishell, G. (2014). Interneuron cell types are fit to function. *Nature* *505*,  
889 318–326.

890 Klaus, J., Kanton, S., Kyrousi, C., Cristina Ayo-Martin, A., Di Giaimo, R., Riesenberger, S., O,  
891 A.C., Gray Camp, J., Tocco, C., Santel, M., et al. Altered neuronal migratory trajectories in  
892 human cerebral organoids derived from individuals with neuronal heterotopia. *Nat. Med.*

893 Krienen, F.M., Goldman, M., Zhang, Q., C. H. del Rosario, R., Florio, M., Machold, R.,  
894 Saunders, A., Levandowski, K., Zaniewski, H., Schuman, B., et al. (2020). Innovations  
895 present in the primate interneuron repertoire. *Nature* *586*, 262–269.

896 Kumar, S., Reynolds, K., Ji, Y., Gu, R., Rai, S., and Zhou, C.J. (2019). Impaired  
897 neurodevelopmental pathways in autism spectrum disorder: A review of signaling  
898 mechanisms and crosstalk. *J. Neurodev. Disord.* *11*, 1–14.

899 Kyrousi, C., O’Neill, A.C., Brazovskaja, A., He, Z., Kielkowski, P., Coquand, L., Di Giaimo,  
900 R., D’ Andrea, P., Belka, A., Forero Echeverry, A., et al. (2021). Extracellular LGALS3BP  
901 regulates neural progenitor position and relates to human cortical complexity. *Nat. Commun.*  
902 *12*, 1–22.

903 Lai, E.C. (2004). Notch signaling: Control of cell communication and cell fate. *Development*  
904 *131*, 965–973.

905 Lancaster, M.A., Corsini, N.S., Wolfinger, S., Gustafson, E.H., Phillips, A.W., Burkard, T.R.,  
906 Otani, T., Livesey, F.J., and Knoblich, J.A. (2017). Guided self-organization and cortical  
907 plate formation in human brain organoids. *Nat. Biotechnol.* *35*, 659–666.

908 Lee, J.H., Bae, J.A., Lee, J.H., Seo, Y.W., Kho, D.H., Sun, E.G., Lee, S.E., Cho, S.H., Joo,  
909 Y.E., Ahn, K.Y., et al. (2010). Glycoprotein 90K, downregulated in advanced colorectal  
910 cancer tissues, interacts with CD9/CD82 and suppresses the Wnt/ $\beta$ -catenin signal via  
911 ISGylation of  $\beta$ -catenin. *Gut* *59*, 907–917.

912 Lim, L., Mi, D., Llorca, A., and Marín, O. (2018). Development and Functional  
913 Diversification of Cortical Interneurons. *Neuron* *100*, 294–313.

914 Long, K.R., and Huttner, W.B. (2019). How the extracellular matrix shapes neural  
915 development. *Open Biol.* *9*.

916 Long, K.R., Newland, B., Florio, M., Kalebic, N., Langen, B., Kolterer, A., Wimberger, P.,  
917 and Huttner, W.B. (2018). Extracellular Matrix Components HAPLN1, Lumican, and

- 918 Collagen I Cause Hyaluronic Acid-Dependent Folding of the Developing Human Neocortex.  
919 *Neuron* *99*, 702-719.e7.
- 920 Love, M.I., Huber, W., and Anders, S. (2014). Moderated estimation of fold change and  
921 dispersion for RNA-seq data with DESeq2. *Genome Biol.* *15*, 1–21.
- 922 Maeda, N. (2015). Proteoglycans and neuronal migration in the cerebral cortex during  
923 development and disease. *Front. Neurosci.* *9*, 1–15.
- 924 Mariani, J., Coppola, G., Pelphrey, K.A., Howe, J.R., and Vaccarino Correspondence, F.M.  
925 (2015). FOXP1-Dependent Dysregulation of GABA/ Glutamate Neuron Differentiation in  
926 Autism Spectrum Disorders. *Cell* *162*, 375–390.
- 927 Marín, O., and Rubenstein, J.L.R. (2001). A LONG , REMARKABLE JOURNEY :  
928 TANGENTIAL MIGRATION IN THE TELENCEPHALON. *2*, 780–790.
- 929 Masselink, W., Reumann, D., Murawala, P., Pasierbek, P., Taniguchi, Y., Bonnay, F.,  
930 Meixner, K., Knoblich, J.A., and Tanaka, E.M. (2019). Broad applicability of a streamlined  
931 ethyl cinnamate-based clearing procedure. *Development* *146*, dev166884.
- 932 Di Matteo, F., Pipicelli, F., Kyrousi, C., Tovecci, I., Penna, E., Crispino, M., Chambery, A.,  
933 Russo, R., Ayo-Martin, A.C., Giordano, M., et al. (2020). Cystatin B is essential for  
934 proliferation and interneuron migration in individuals with EPM 1 epilepsy . *EMBO Mol.*  
935 *Med.* *12*, 1–21.
- 936 Miura, Y., Li, M.Y., Birey, F., Ikeda, K., Revah, O., Thete, M.V., Park, J.Y., Puno, A., Lee,  
937 S.H., Porteus, M.H., et al. (2020). Generation of human striatal organoids and cortico-striatal  
938 assembloids from human pluripotent stem cells. *Nat. Biotechnol.* *38*, 1421–1430.
- 939 Nawaz, M., and Fatima, F. (2017). Extracellular vesicles, tunneling nanotubes, and cellular  
940 interplay: Synergies and missing links. *Front. Mol. Biosci.* *4*, 1–12.
- 941 Oberst, P., Fièvre, S., Baumann, N., Concetti, C., Bartolini, G., and Jabaudon, D. (2019).  
942 Temporal plasticity of apical progenitors in the developing mouse neocortex. *Nature* *573*,  
943 370–374.
- 944 Paulsen, B., Velasco, S., Kedaigle, A.J., Pigoni, M., Quadrato, G., Deo, A.J., Adiconis, X.,  
945 Uzquiano, A., Sartore, R., Yang, S.M., et al. (2022). Autism genes converge on asynchronous  
946 development of shared neuron classes (Springer US).
- 947 Perez-Riverol, Y., Csordas, A., Bai, J., Bernal-Llinares, M., Hewapathirana, S., Kundu, D.J.,  
948 Inuganti, A., Griss, J., Mayer, G., Eisenacher, M., et al. (2019). The PRIDE database and



949 related tools and resources in 2019: Improving support for quantification data. *Nucleic Acids*  
950 *Res.* *47*, D442–D450.

951 Peruzzotti-Jametti, L., Bernstock, J.D., Willis, C.M., Manferrari, G., Rogall, R., Fernandez-  
952 Vizarra, E., Williamson, J.C., Braga, A., van den Bosch, A., Leonardi, T., et al. (2021).  
953 Neural stem cells traffic functional mitochondria via extracellular vesicles.

954 Peyre, E., Silva, C.G., and Nguyen, L. (2015). Crosstalk between intracellular and  
955 extracellular signals regulating interneuron production, migration and integration into the  
956 cortex. *Front. Cell. Neurosci.* *9*, 1–18.

957 Pikkarainen, T., Nurmi, T., Sasaki, T., Bergmann, U., and Vainio, S. (2017). Role of the  
958 extracellular matrix-located Mac-2 binding protein as an interactor of the Wnt proteins.  
959 *Biochem. Biophys. Res. Commun.* *491*, 953–957.

960 Pilz, G.A., Shitamukai, A., Reillo, I., Pacary, E., Schwausch, J., Stahl, R., Ninkovic, J.,  
961 Snippert, H.J., Clevers, H., Godinho, L., et al. (2013). Amplification of progenitors in the  
962 mammalian telencephalon includes a new radial glial cell type. *Nat. Commun.* *4*, 1–11.

963 Piñero, J., Bravo, Á., Queralt-Rosinach, N., Gutiérrez-Sacristán, A., Deu-Pons, J., Centeno,  
964 E., García-García, J., Sanz, F., and Furlong, L.I. (2017). DisGeNET: A comprehensive  
965 platform integrating information on human disease-associated genes and variants. *Nucleic*  
966 *Acids Res.* *45*, D833–D839.

967 Prianichnikov, N., Koch, H., Koch, S., Lubeck, M., Heilig, R., Brehmer, S., Fischer, R., and  
968 Cox, J. (2020). Maxquant software for ion mobility enhanced shotgun proteomics. *Mol. Cell.*  
969 *Proteomics* *19*, 1058–1069.

970 Puts, N.A.J., Wodka, E.L., Harris, A.D., Crocetti, D., Tommerdahl, M., Mostofsky, S.H., and  
971 Edden, R.A.E. (2016). Reduced GABA and Altered Somatosensory Function in Children  
972 with Autism Spectrum Disorder. 1–12.

973 Rallu, M., Machold, R., Gaiano, N., Corbin, J.G., McMahon, A.P., and Fishell, G. (2002).  
974 Dorsventral patterning is established in the telencephalon of mutants lacking both Gli3 and  
975 hedgehog signaling. *Development* *129*, 4963–4974.

976 Sharma, P., Mesci, P., Carromeu, C., McClatchy, D.R., Schiapparelli, L., Yates, J.R., Muotri,  
977 A.R., and Cline, H.T. (2019). Exosomes regulate neurogenesis and circuit assembly. *Proc.*  
978 *Natl. Acad. Sci. U. S. A.* *116*, 16086–16094.

979 Silva, C.G., Peyre, E., and Nguyen, L. Cell migration promotes dynamic cellular interactions

980 to control cerebral cortex morphogenesis.

981 Silva, C.G., Peyre, E., Adhikari, M.H., Tielens, S., Tanco, S., Van Damme, P., Magno, L.,  
982 Krusy, N., Agirman, G., Magiera, M.M., et al. (2018). Cell-Intrinsic Control of Interneuron  
983 Migration Drives Cortical Morphogenesis. *Cell* 172, 1063-1078.e19.

984 Stampolidis, P., Ullrich, A., and Iacobelli, S. (2015). LGALS3BP , lectin galactoside-binding  
985 soluble 3 binding protein , promotes oncogenic cellular events impeded by antibody  
986 intervention. 39–52.

987 Steinecke, A., Gampe, C., Zimmer, G., Rudolph, J., and Bolz, J. (2014). EphA / ephrin A  
988 reverse signaling promotes the migration of cortical interneurons from the medial ganglionic  
989 eminence. 460–471.

990 De Strooper, B., and Annaert, W. (2001). Where Notch and Wnt signaling meet: The  
991 presenilin hub. *J. Cell Biol.* 152, 17–20.

992 Tatti, R., Haley, M.S., Swanson, O.K., Tselha, T., and Maffei, A. (2017). Neurophysiology  
993 and Regulation of the Balance Between Excitation and Inhibition in Neocortical Circuits.  
994 *Biol. Psychiatry* 81, 821–831.

995 Taverna, E., and Huttner, W.B. (2010). Neural progenitor nuclei IN motion. *Neuron* 67, 906–  
996 914.

997 Theil, T., Alvarez-Bolado, G., Walter, A., and Rütger, U. (1999). Gli3 is required for Emx  
998 gene expression during dorsal telencephalon development. *Development* 126, 3561–3571.

999 Tole, S., Ragsdale, C.W., and Grove, E.A. (2000). Dorsoventral patterning of the  
1000 telencephalon is disrupted in the mouse mutant extra-toes. *Dev. Biol.* 217, 254–265.

1001 Trapnell, C., Cacchiarelli, D., Grimsby, J., Pokharel, P., Li, S., Morse, M., Lennon, N.J.,  
1002 Livak, K.J., Mikkelsen, T.S., and Rinn, J.L. (2014). The dynamics and regulators of cell fate  
1003 decisions are revealed by pseudotemporal ordering of single cells. *Nat. Biotechnol.* 32, 381–  
1004 386.

1005 Tyanova, S., Temu, T., and Cox, J. (2016). The MaxQuant computational platform for mass  
1006 spectrometry-based shotgun proteomics. *Nat. Protoc.* 11, 2301–2319.

1007 Villa, C.E., Cheroni, C., Dotter, C.P., Danzl, J.G., Testa, G., and Novarino, G. (2022). Article  
1008 CHD8 haploinsufficiency links autism to transient alterations in excitatory and inhibitory  
1009 trajectories || CHD8 haploinsufficiency links autism to transient alterations in excitatory  
1010 and inhibitory trajectories.

- 1011 Wamsley, B., and Fishell, G. (2017). Genetic and activity-dependent mechanisms underlying  
1012 interneuron diversity. *Nat. Rev. Neurosci.* *18*, 299–309.
- 1013 Wang, P., Mokhtari, R., Pedrosa, E., Kirschenbaum, M., Bayrak, C., Zheng, D., and  
1014 Lachman, H.M. CRISPR/Cas9-mediated heterozygous knockout of the autism gene CHD8  
1015 and characterization of its transcriptional networks in cerebral organoids derived from iPS  
1016 cells.
- 1017 Watanabe, K., Taskesen, E., Van Bochoven, A., and Posthuma, D. (2017). Functional  
1018 mapping and annotation of genetic associations with FUMA. *Nat. Commun.* *8*, 1–10.
- 1019 Xiang, Y., Tanaka, Y., Patterson, B., Kang, Y.J., Govindaiah, G., Roselaar, N., Cakir, B.,  
1020 Kim, K.Y., Lombroso, A.P., Hwang, S.M., et al. (2017). Fusion of Regionally Specified  
1021 hPSC-Derived Organoids Models Human Brain Development and Interneuron Migration.  
1022 *Cell Stem Cell* *21*, 383-398.e7.
- 1023 Yu, Y., Zeng, Z., Xie, D., Chen, R., Sha, Y., Huang, S., Cai, W., Chen, W., Li, W., Ke, R., et  
1024 al. (2021). Interneuron origin and molecular diversity in the human fetal brain. *Nat. Neurosci.*
- 1025



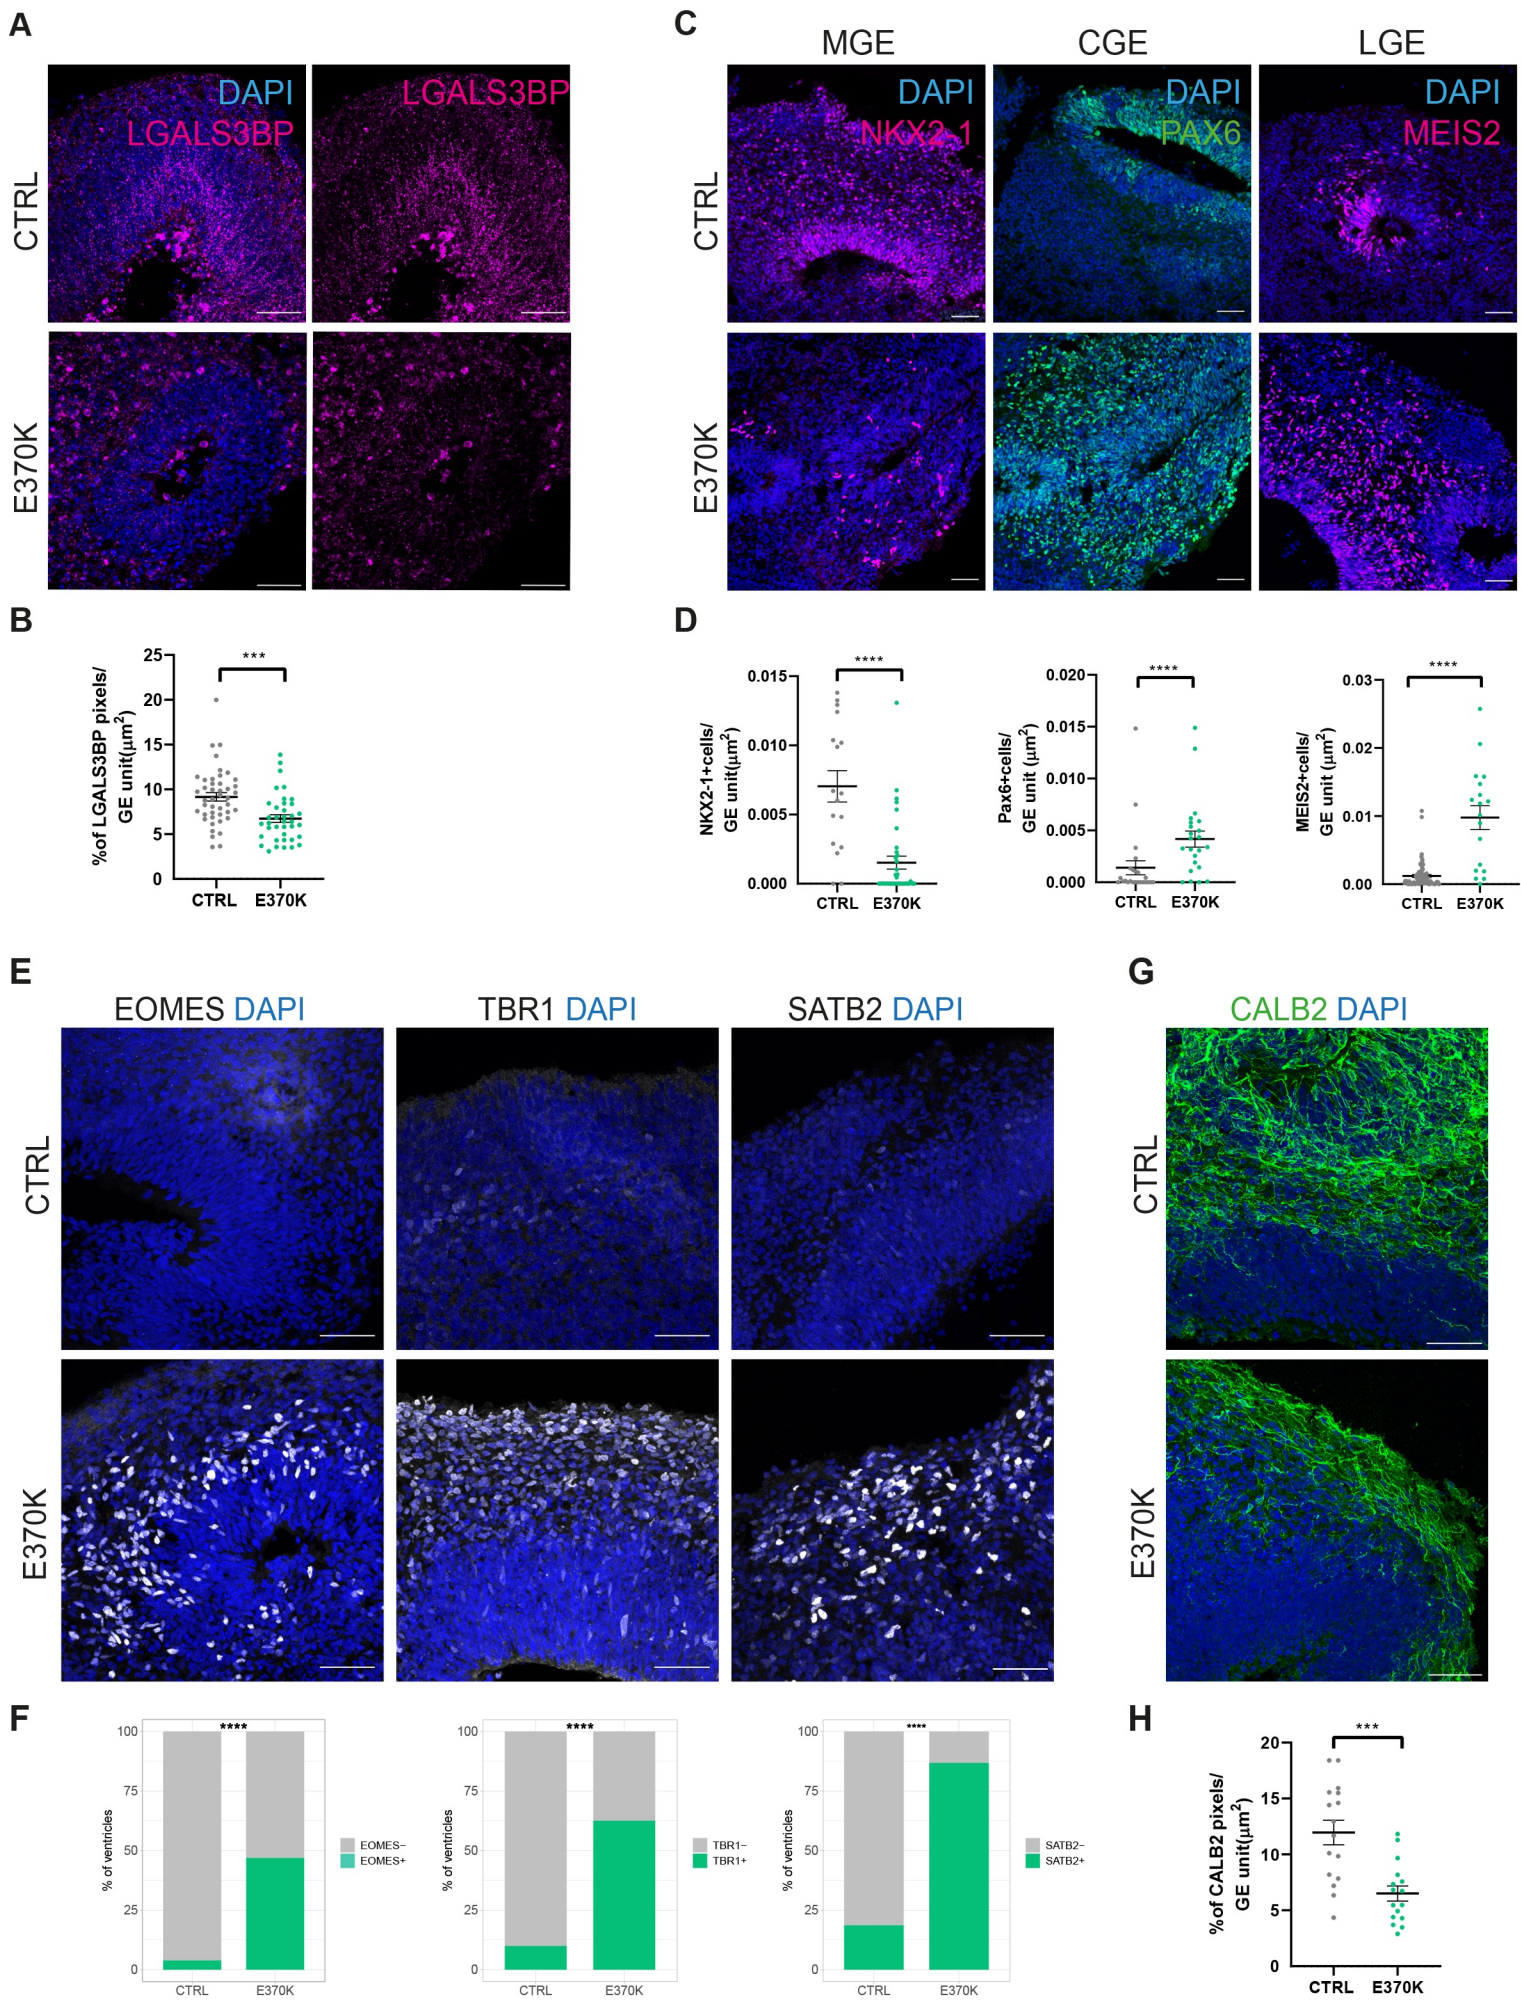



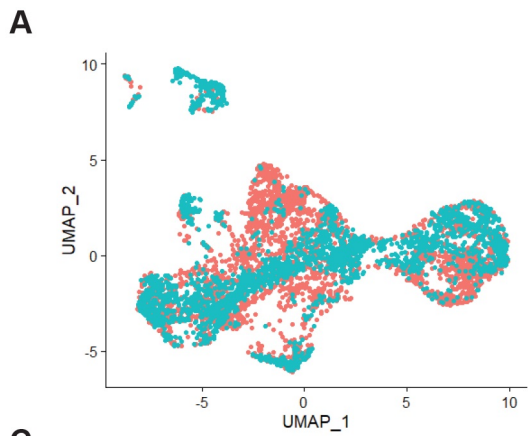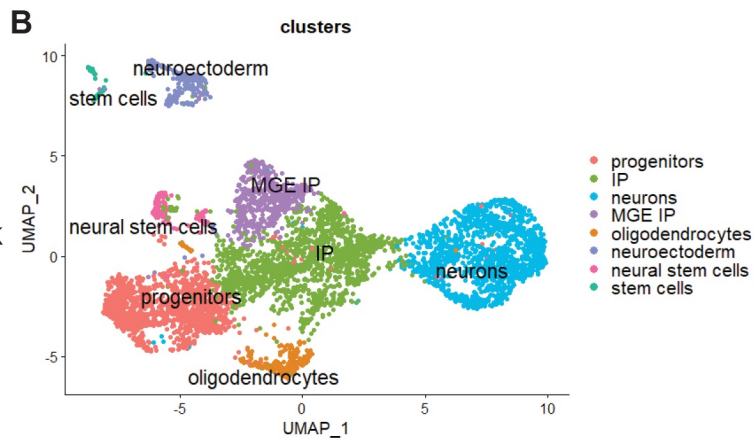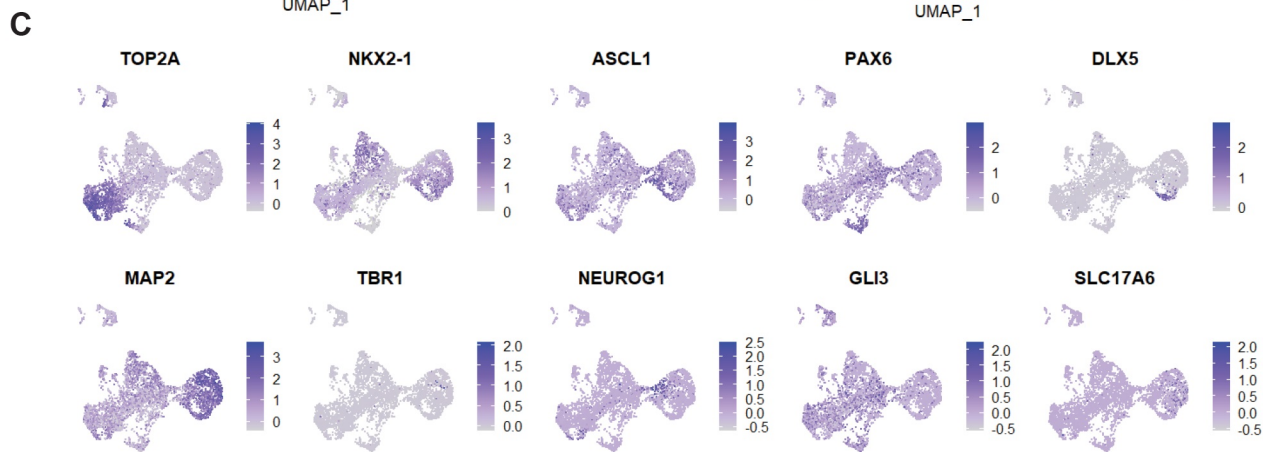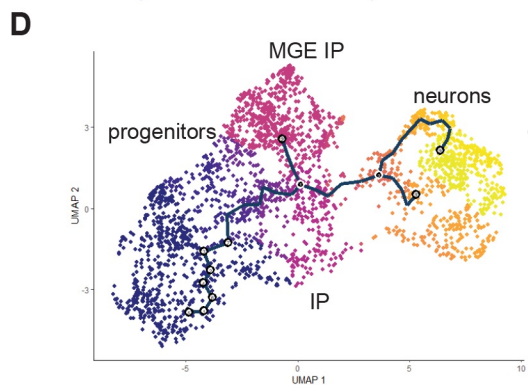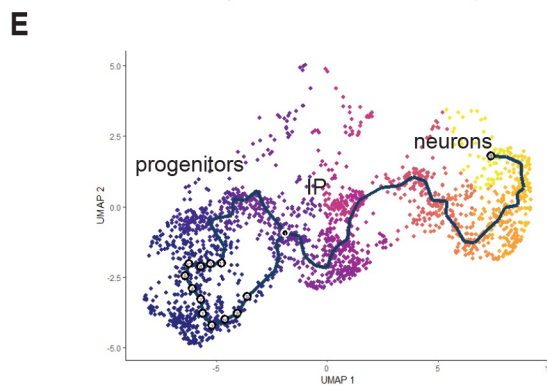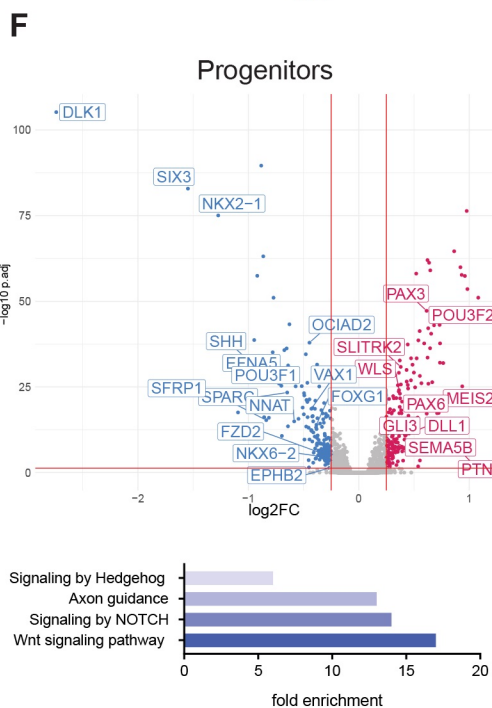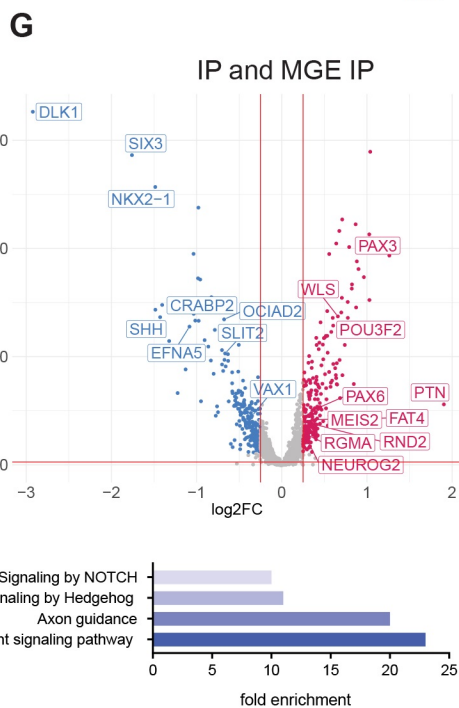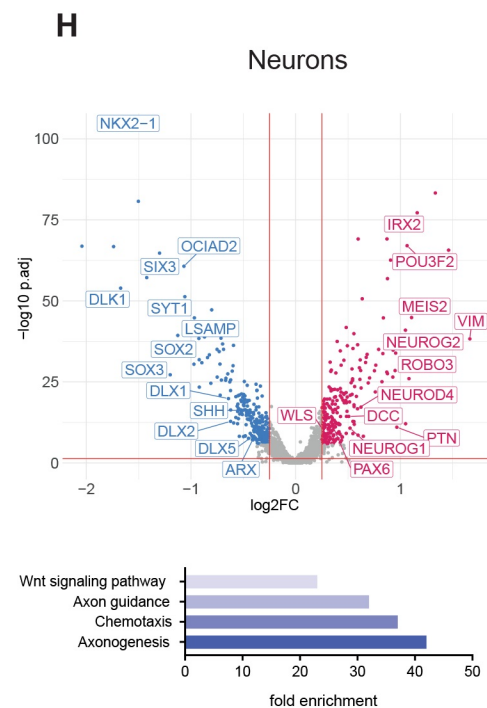

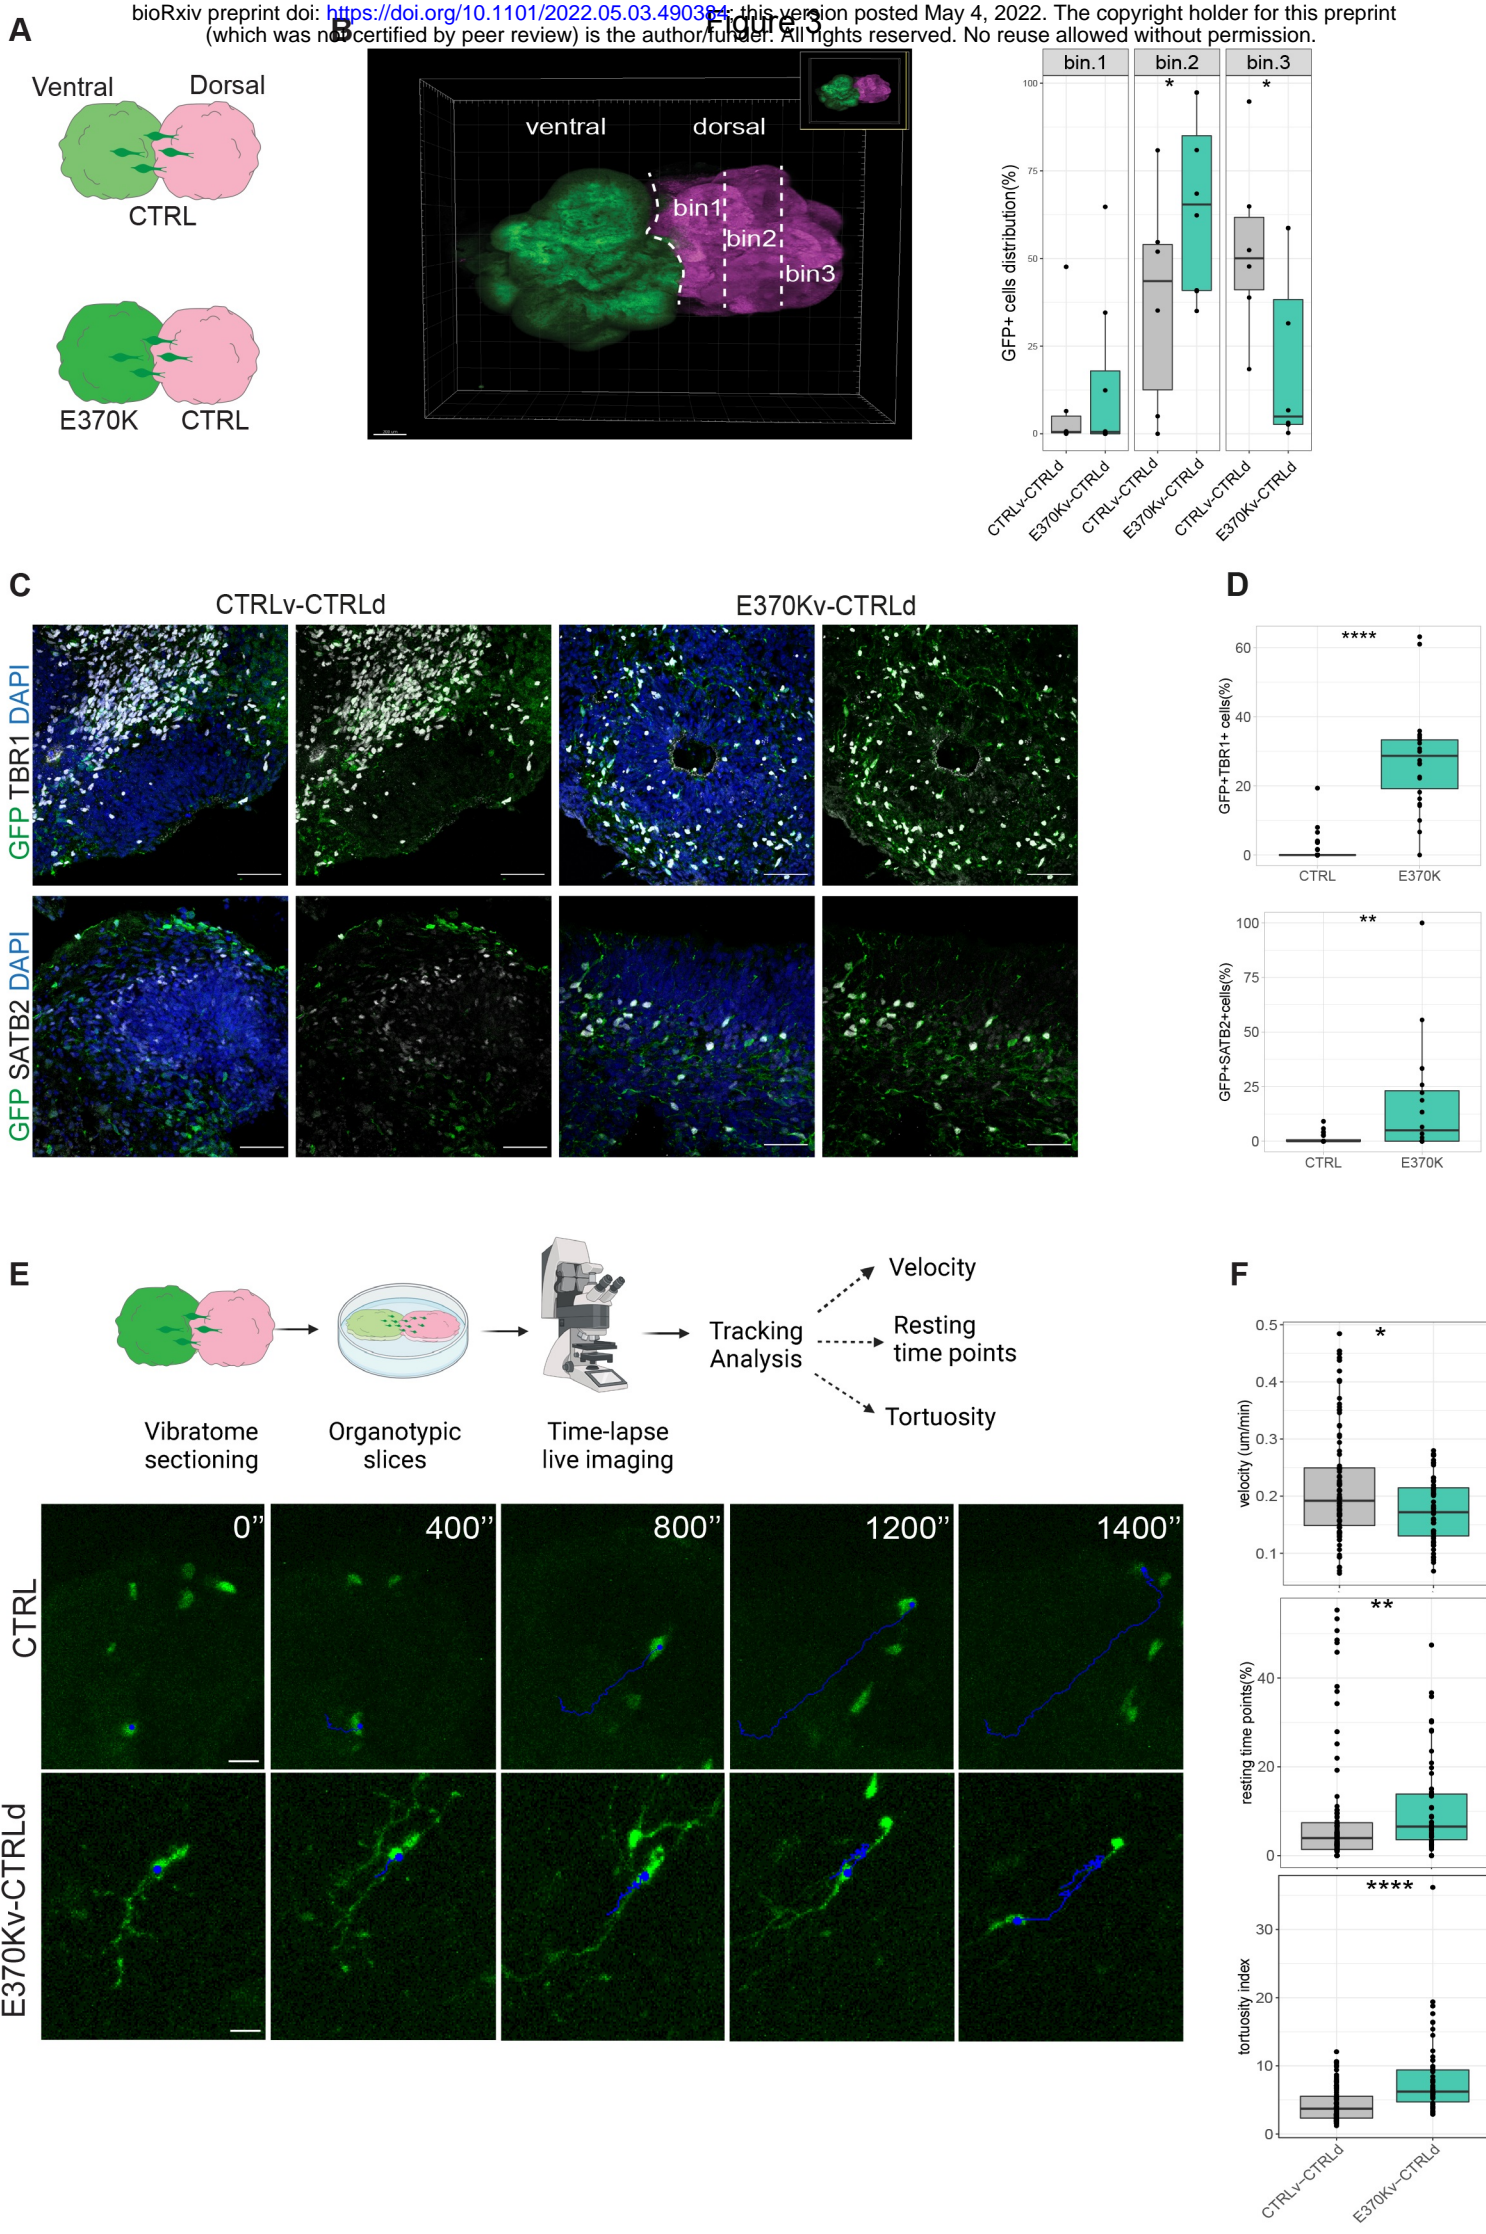



**Figure 4**

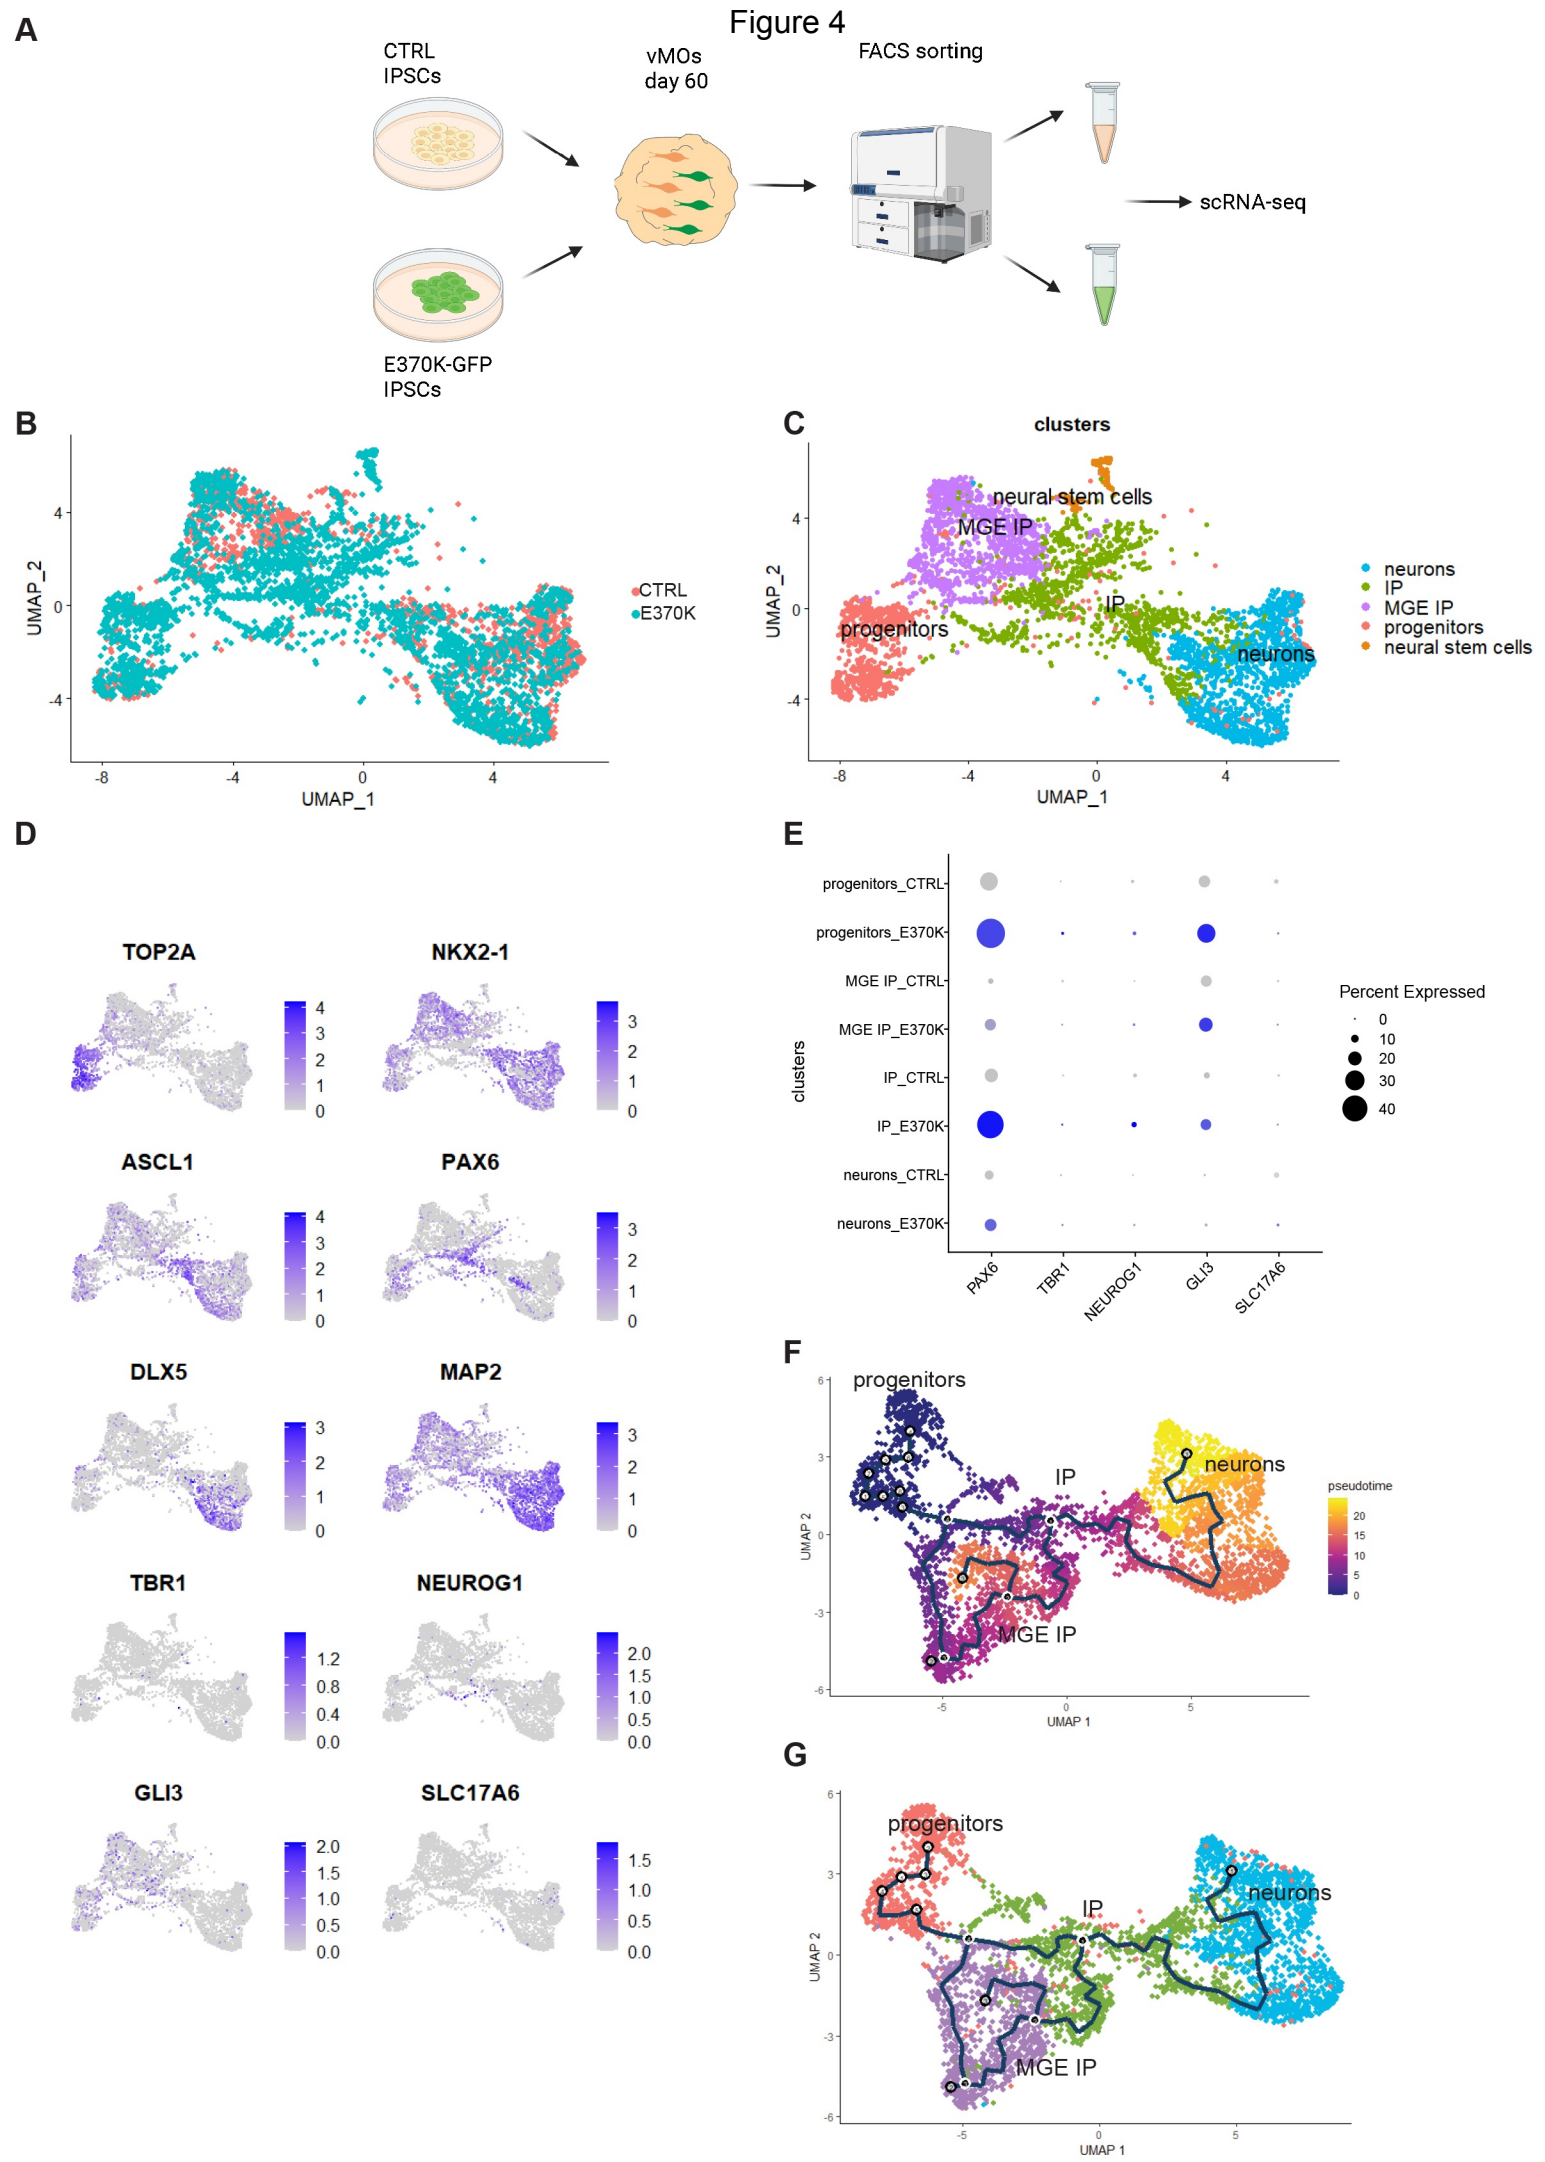

Figure 5

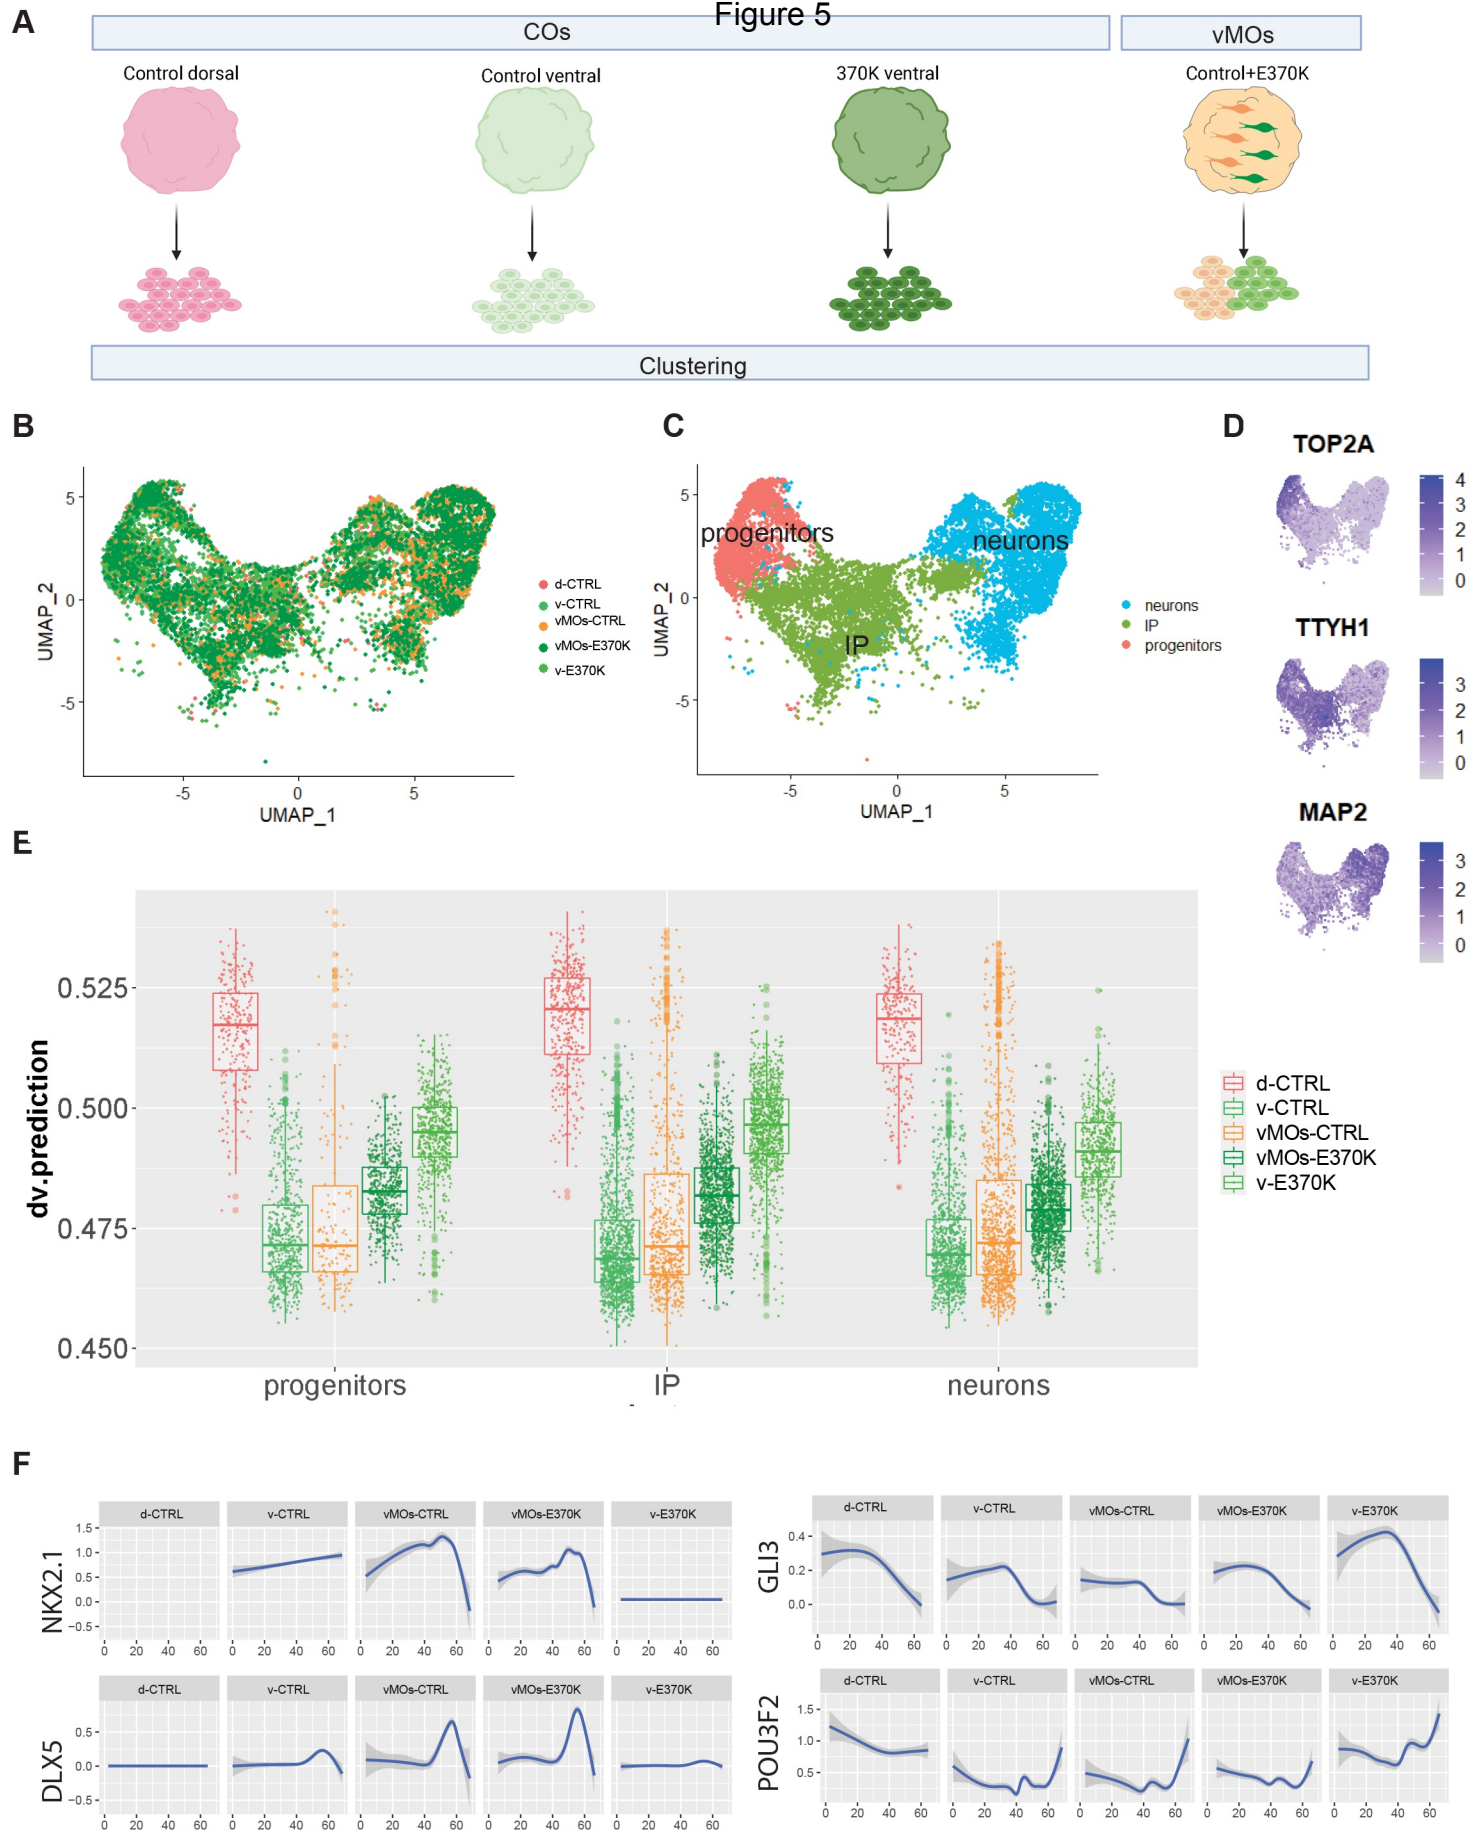

**Figure 6**

**A**

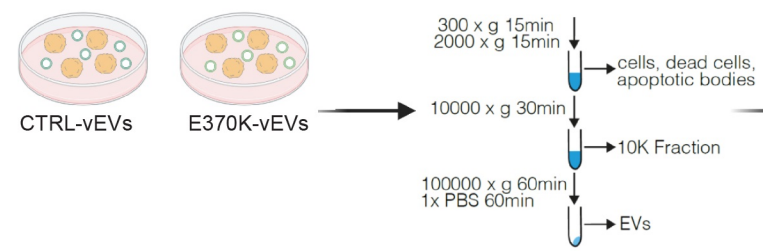

**B**

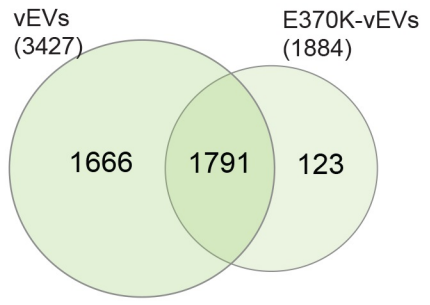

**C**

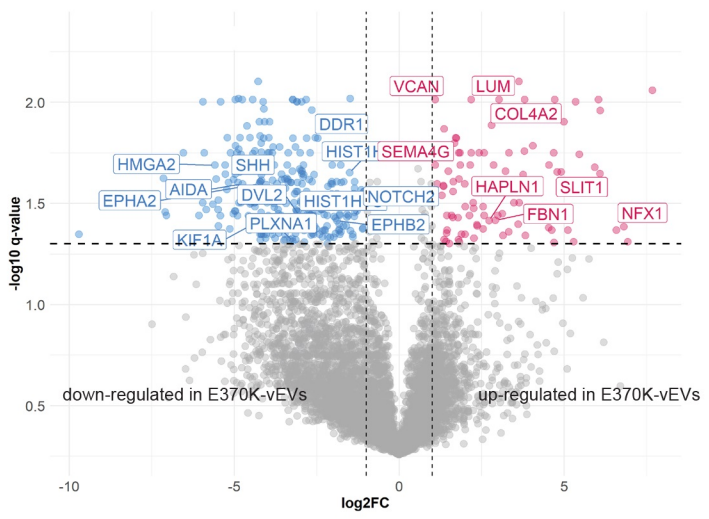

**D**

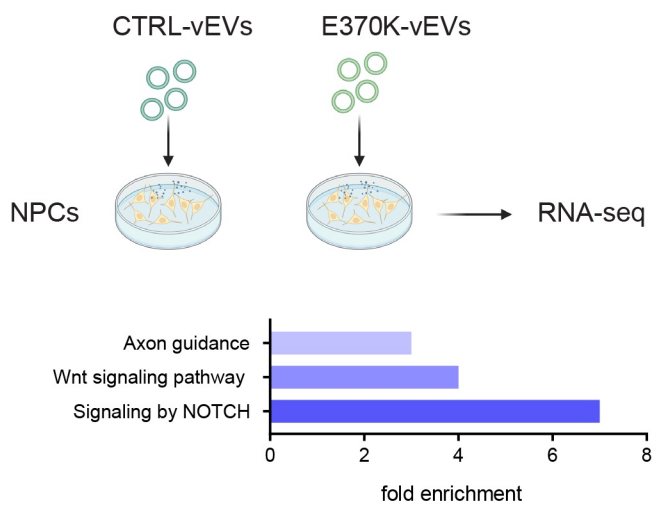

**E WNT pathway**

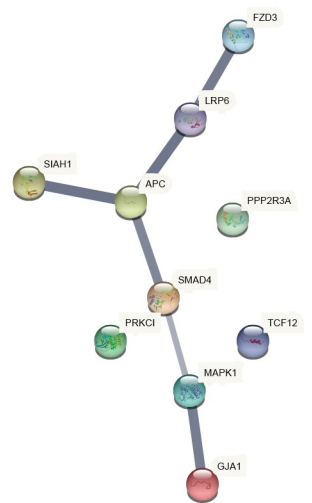

**F NOTCH pathway**

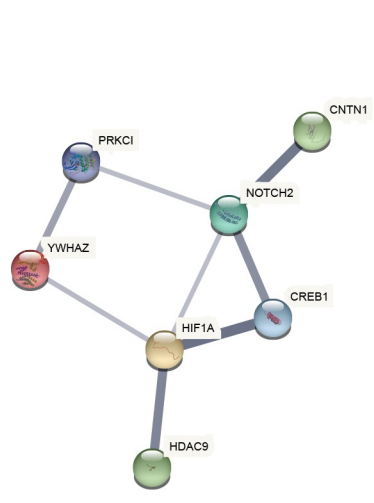

**G Axon guidance**

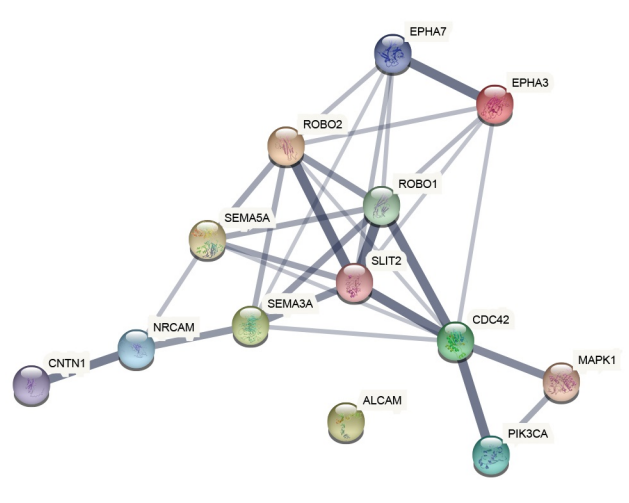



Figure EV1

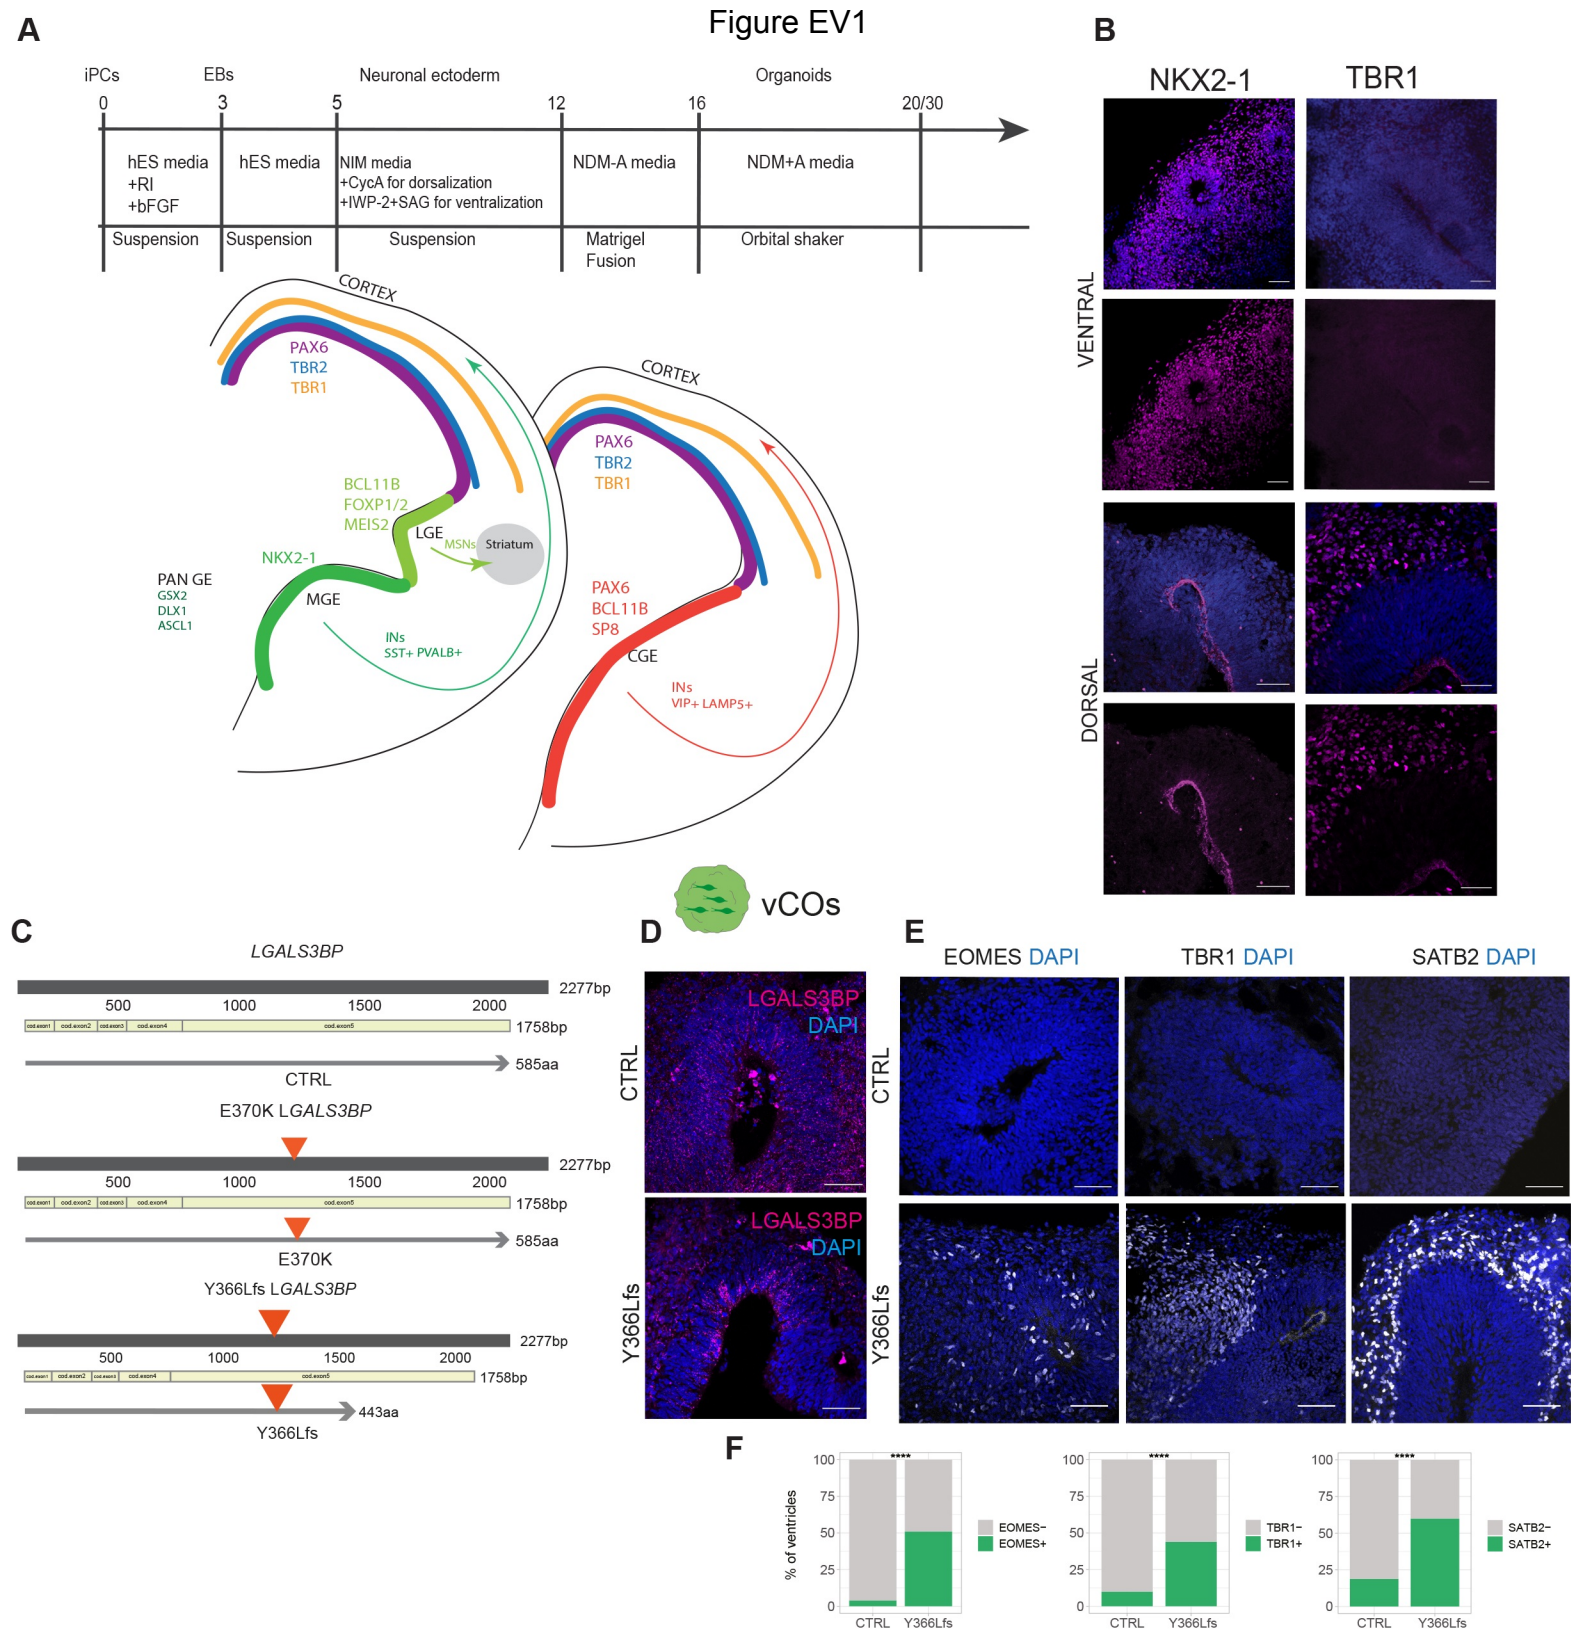

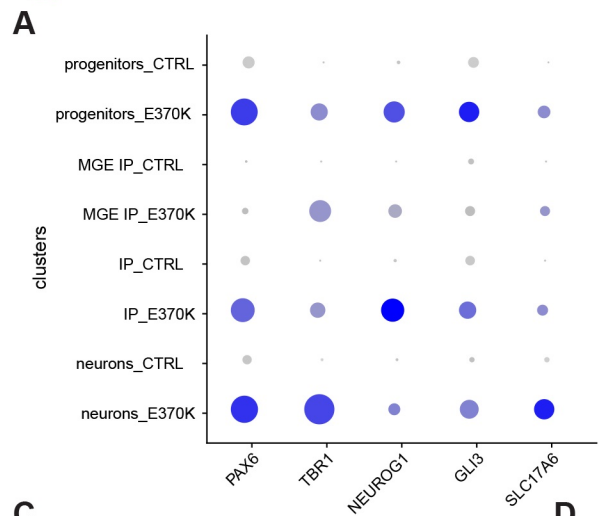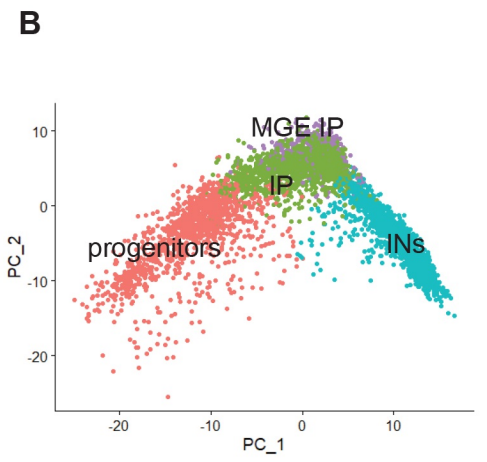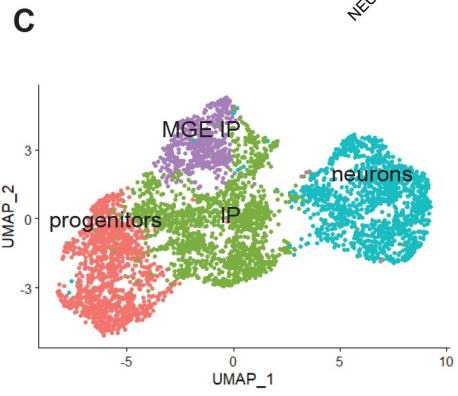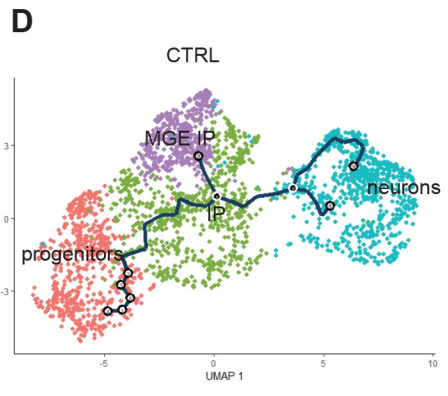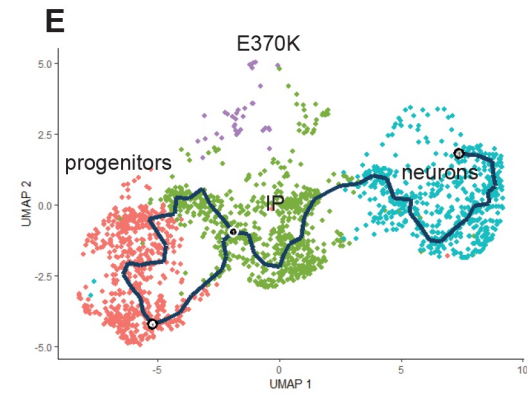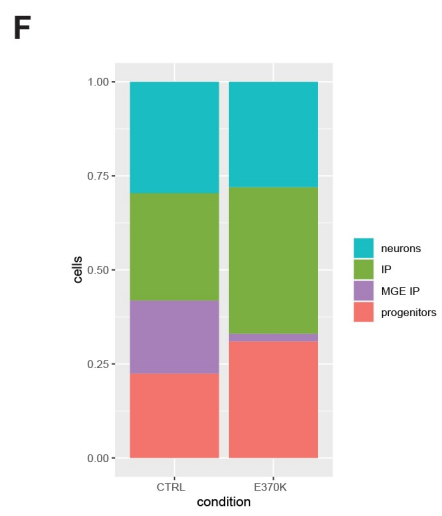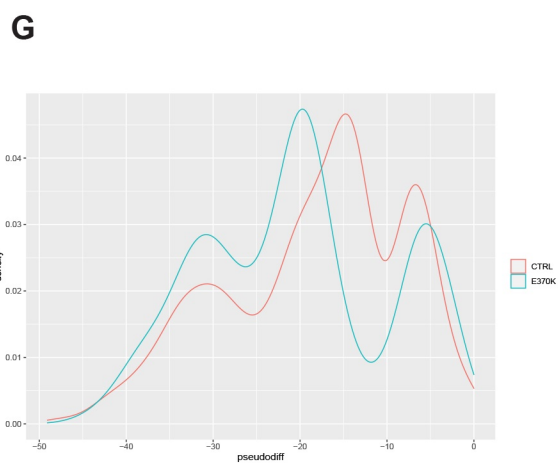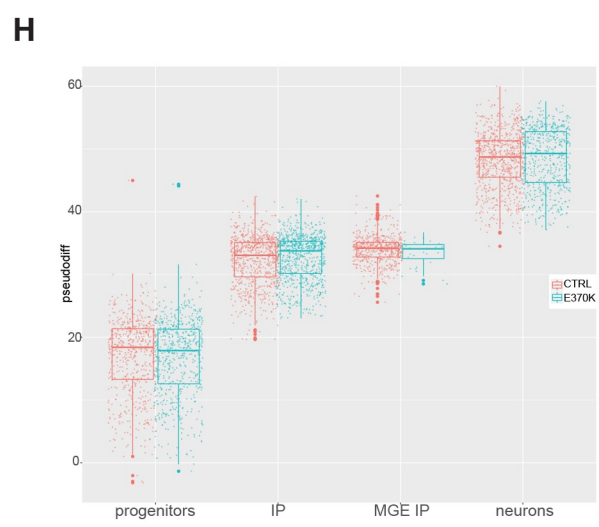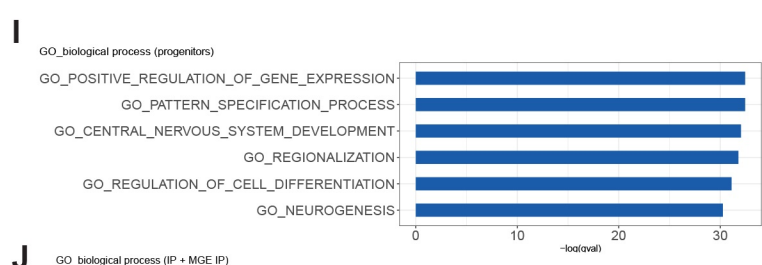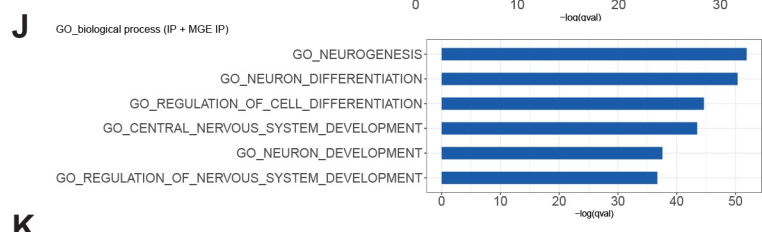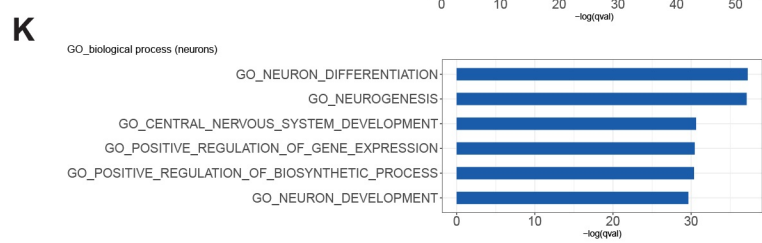

# Figure EV3

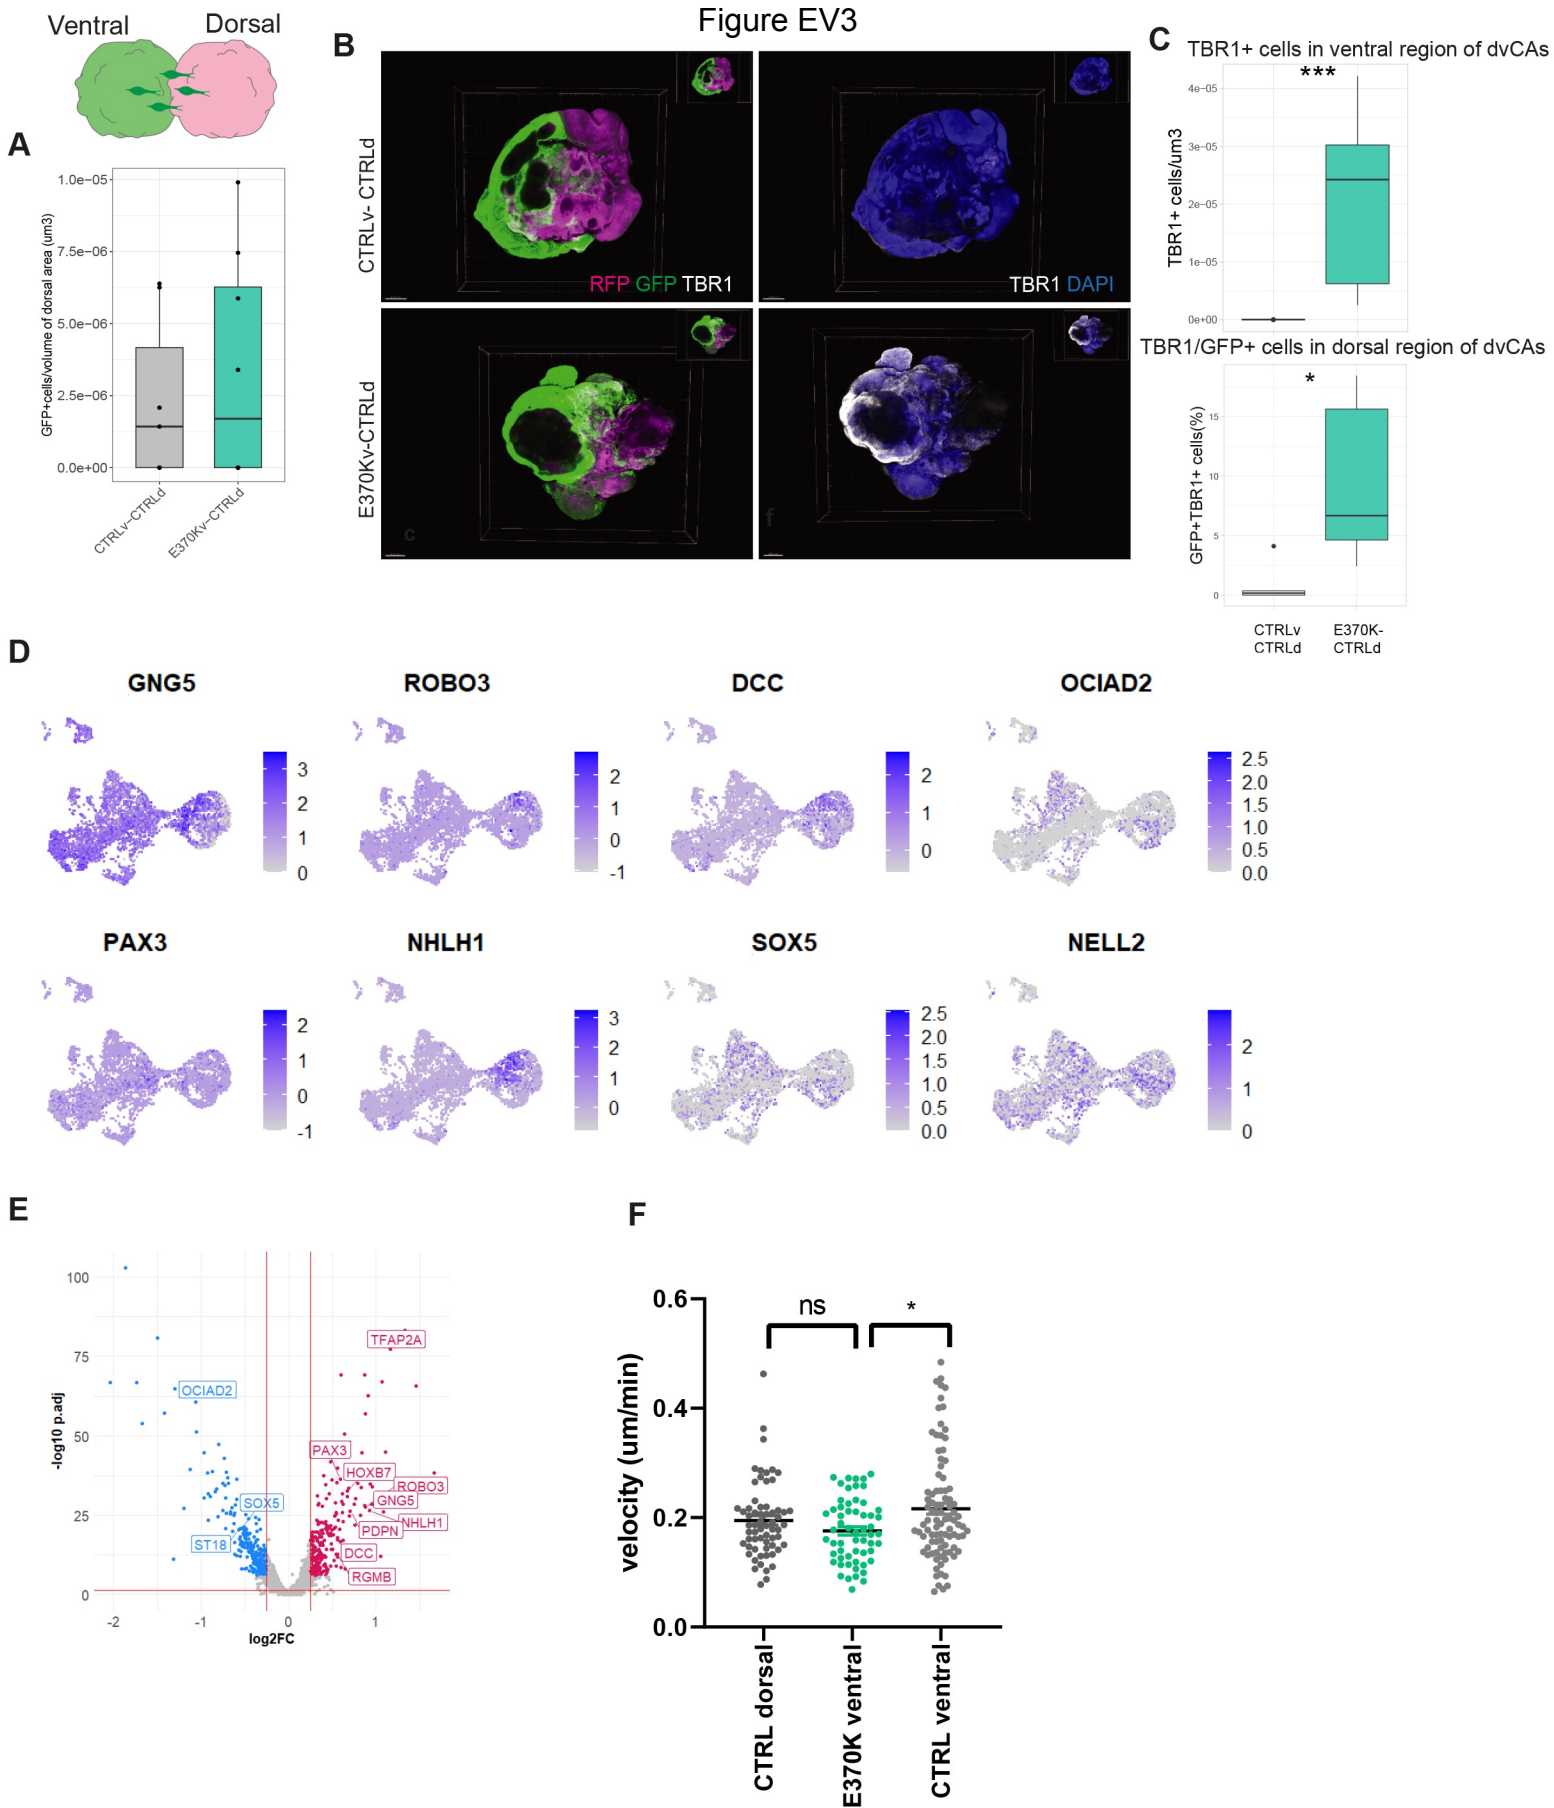



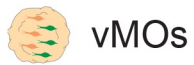

vMOs

Figure EV4

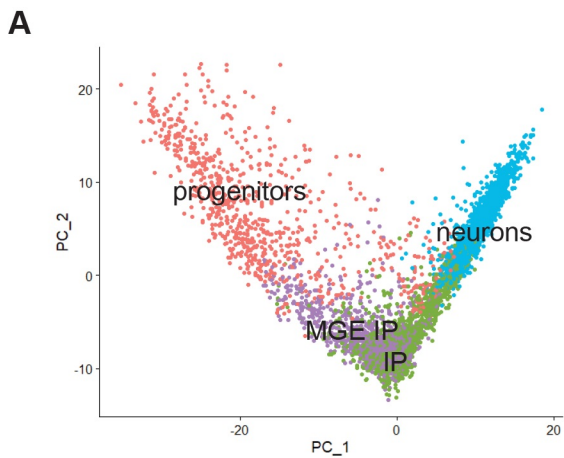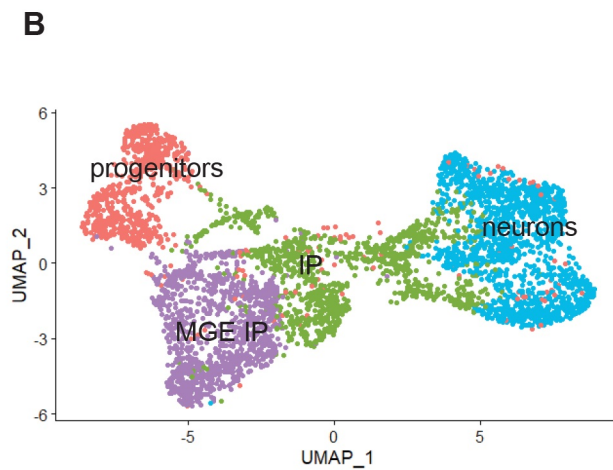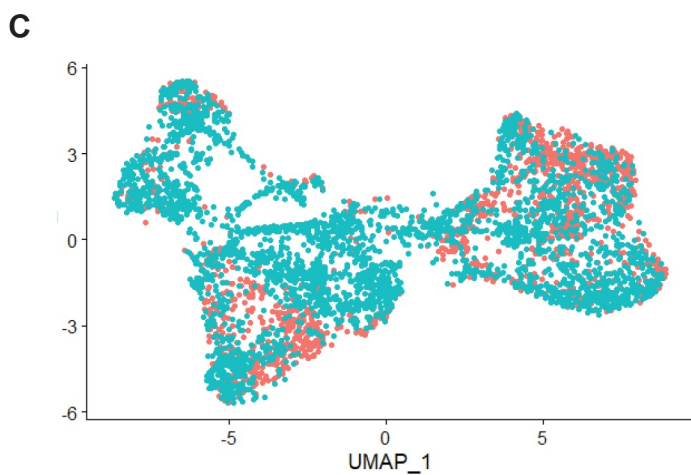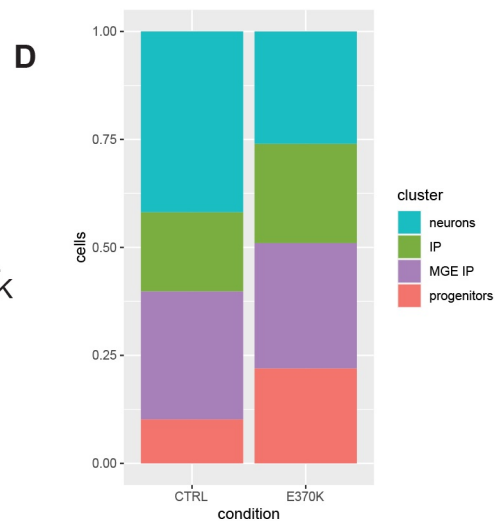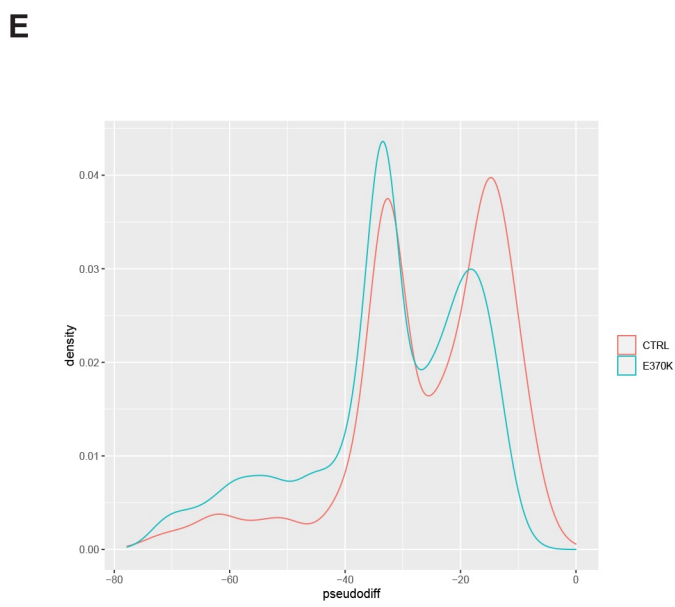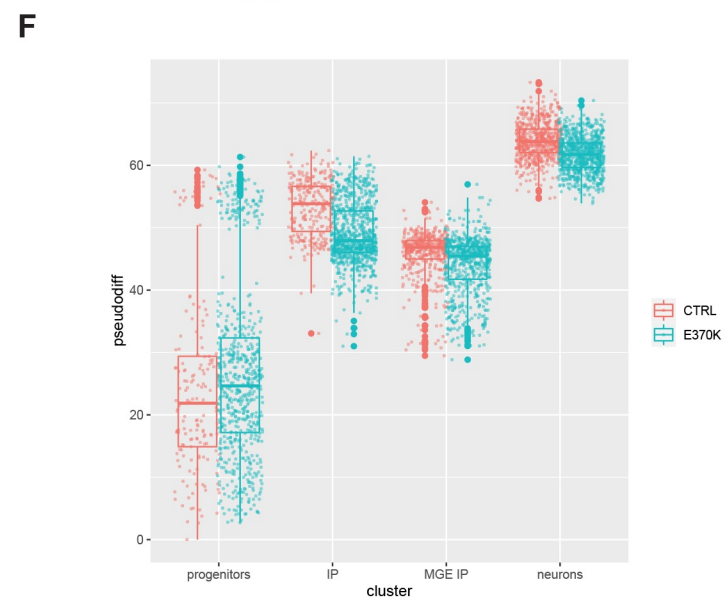

**B** Figure EV5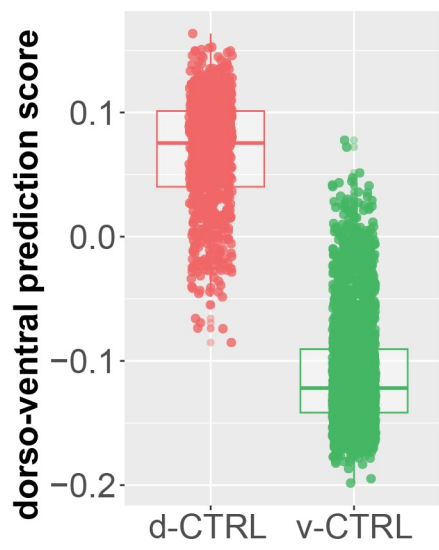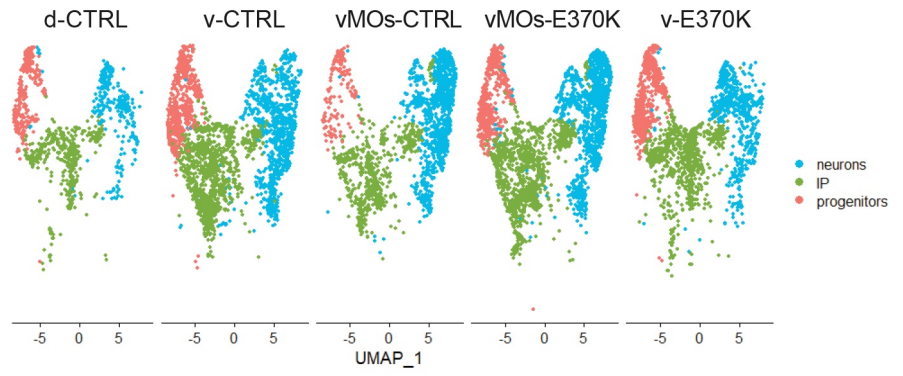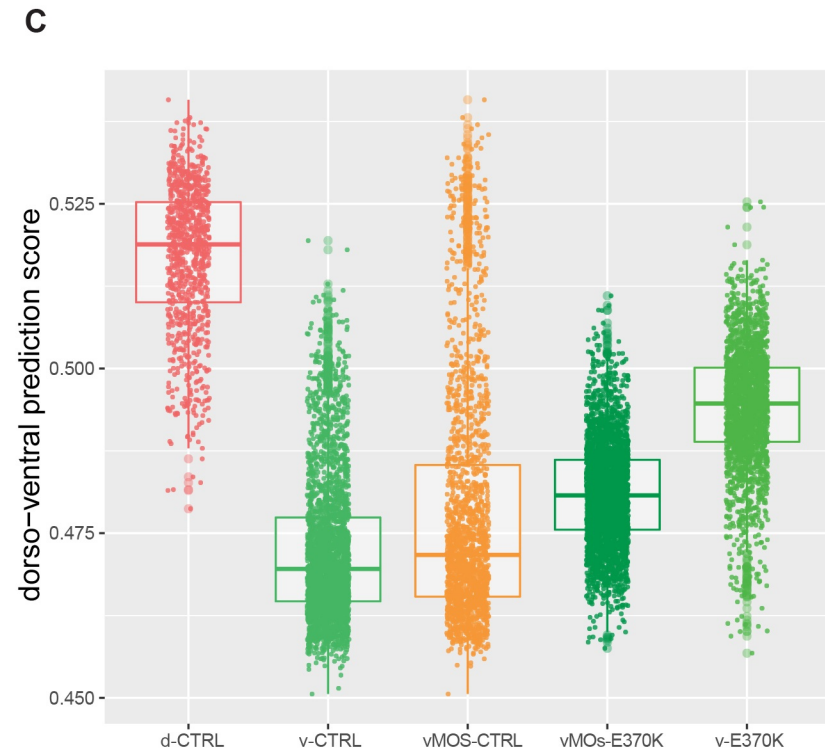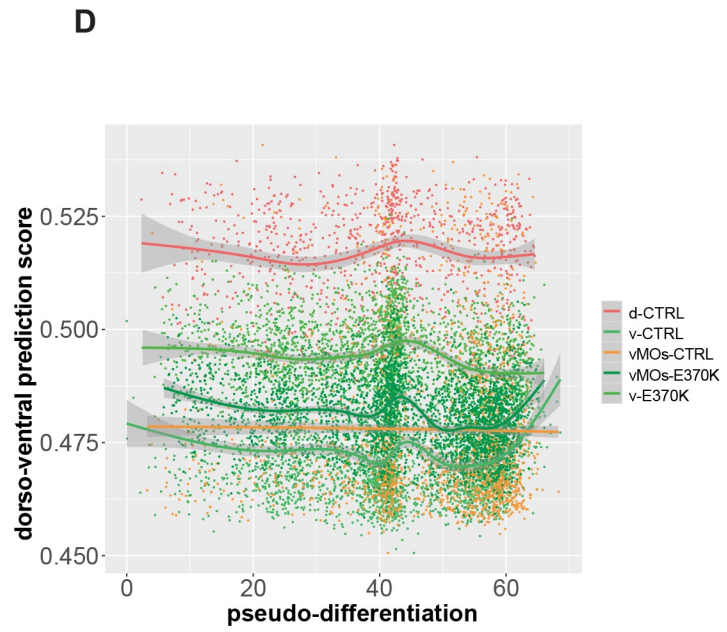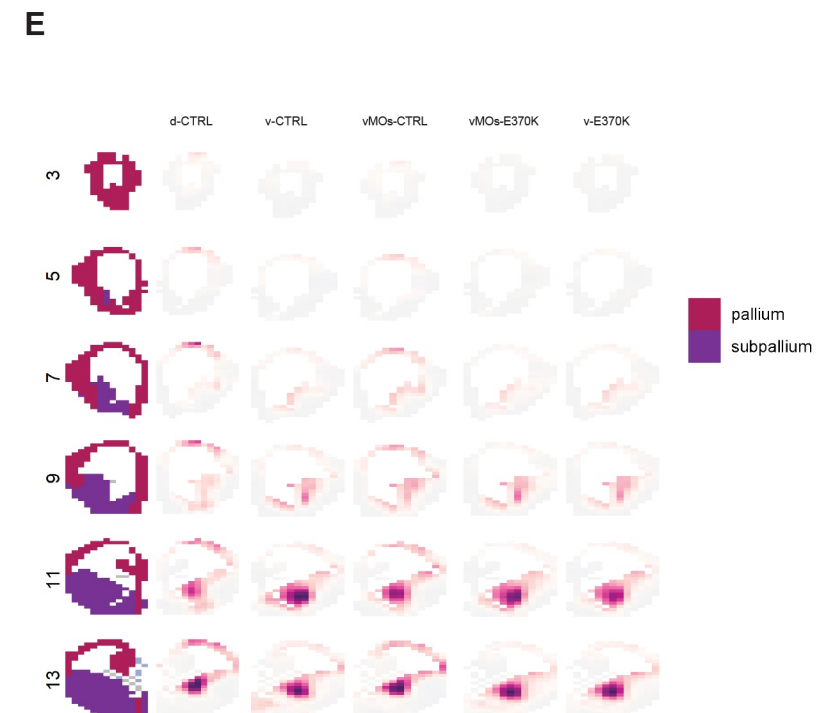

**A**

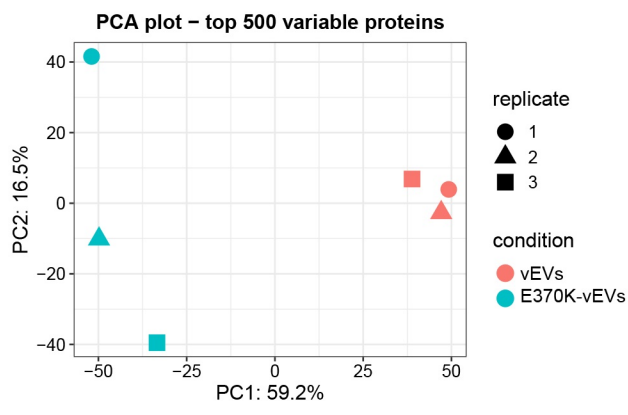

**B Figure EV6**

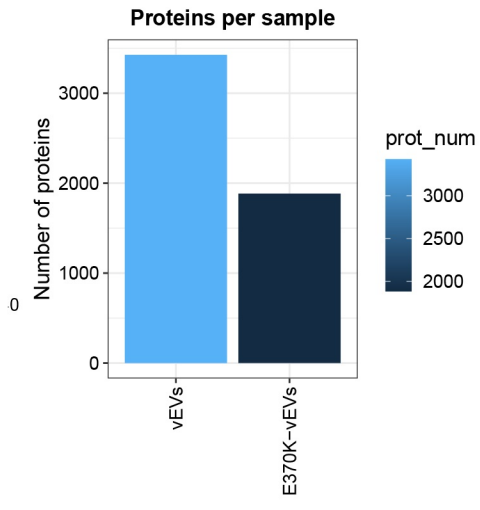

**C**

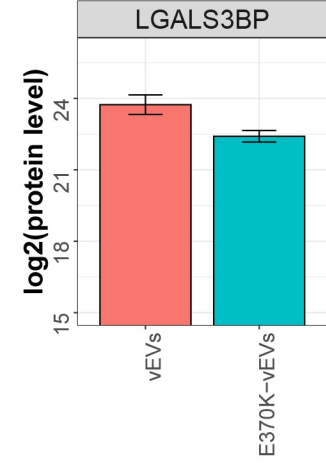

**D**

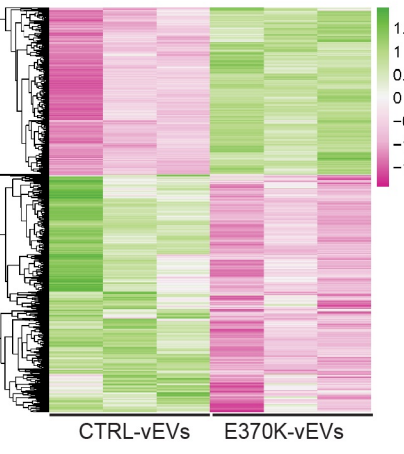

**E**

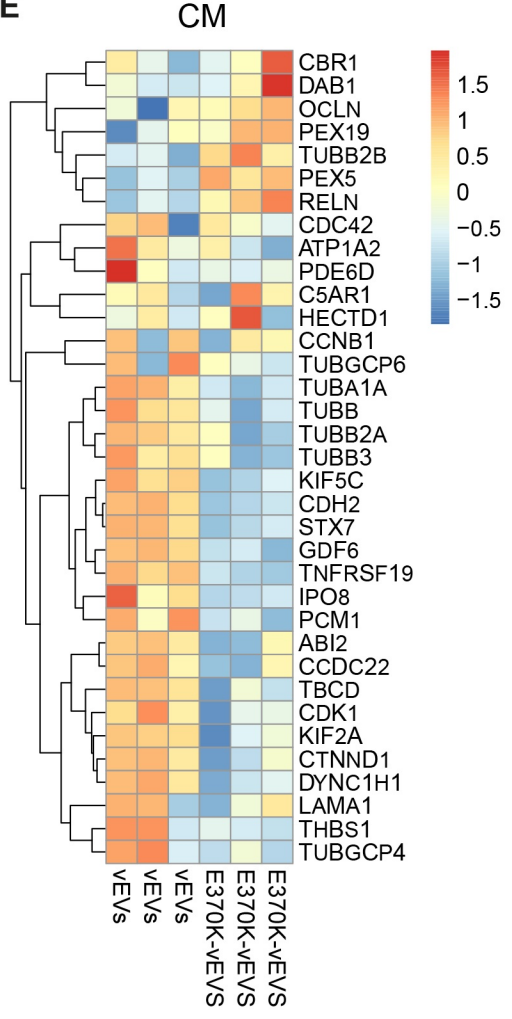

**F**

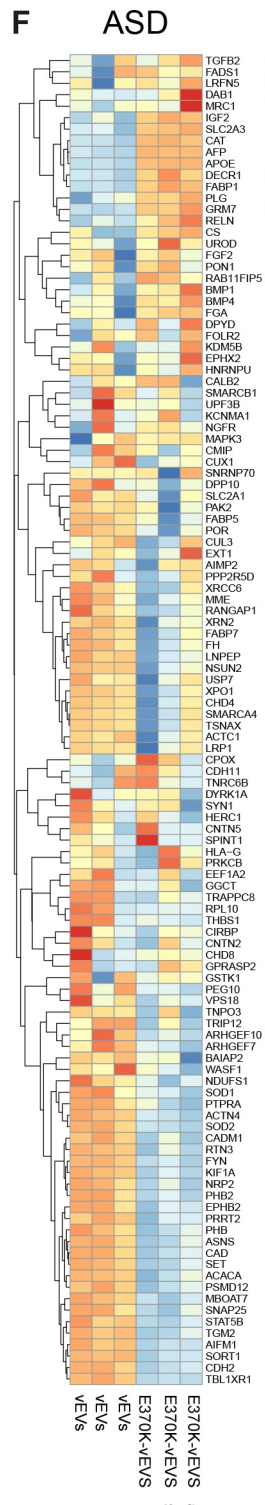

**G**

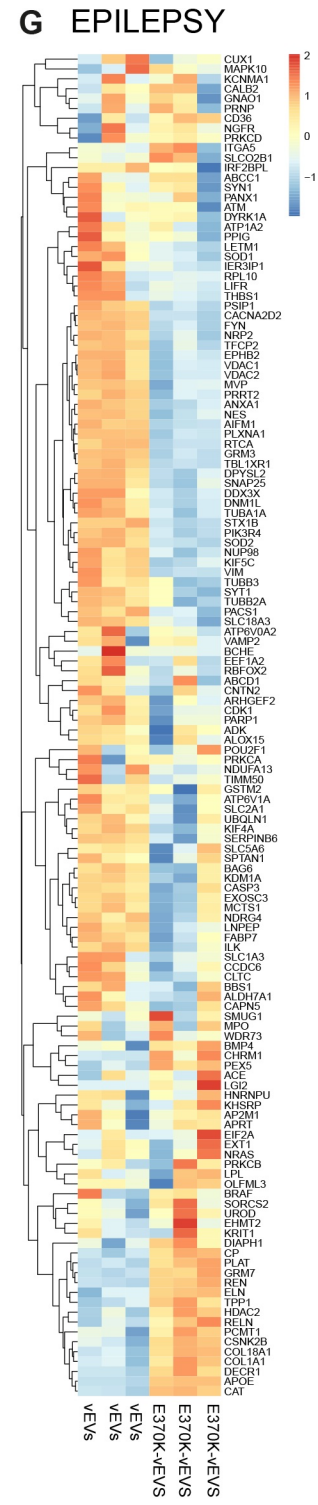

Source: https://www.biorxiv.org/content/10.1101/2022.05.03.490384.full.pdf
